# Supplementary material for: A reactive oxygen species-responsive covalent organic framework for tumor combination therapy
Source: Royal Society of Chemistry journal article supplement (doi:10.1039/d3cc01136d), 2023-01-01
Supplement: d3cc01136d1.pdf [file d3cc01136d1.pdf]

## A reactive oxygen species-responsive covalent organic framework for tumor combination therapy

Wen-Yan Li, Jing-Lan Kan, Jing-Jing Wan, Yan-An Li, Tian Song, Bo Wang, Qun Guan, Le-Le Zhou, and Yu-Bin Dong\*

College of Chemistry, Chemical Engineering and Materials Science, Collaborative Innovation Center of Functionalized Probes for Chemical Imaging in Universities of Shandong, Key Laboratory of Molecular and Nano Probes, Ministry of Education, Shandong Normal University, Jinan 250014, P. R. China. Email: yubindong@sdnu.edu.cn

|                                                                            |    |
|----------------------------------------------------------------------------|----|
| 1. Experimental materials.....                                             | 2  |
| 2. Cell culture and experimental animals .....                             | 2  |
| 3. Experimental instrumentations .....                                     | 3  |
| 4. Statistical analysis .....                                              | 4  |
| 5. Synthesis of 4,4'-(propane-2,2-diylbis(sulfanediyl))dianiline (TK)..... | 4  |
| 6. Synthesis of TKPP-COF.....                                              | 5  |
| 7. Model reaction.....                                                     | 25 |
| 8. Single-line state oxygen detection.....                                 | 25 |
| 9. Synthesis of nano TKPP-COF.....                                         | 26 |
| 10. Synthesis of DC_AC50@nano TKPP-COF .....                               | 27 |
| 11. EPR-trapping tests .....                                               | 28 |
| 12. Photodynamic property .....                                            | 28 |
| 13. Drug release experiments .....                                         | 29 |
| 14. Cell uptake and subcellular localization.....                          | 31 |
| 15. Total copper content in HT-1080 cells by ICP-MS detection.....         | 32 |
| 16. Intracellular total ROS measurements.....                              | 33 |
| 17. Mitochondrial membrane potential measurements .....                    | 33 |
| 18. Intracellular ATP production measurement .....                         | 34 |
| 19. Intracellular and extracellular lactate measurement .....              | 35 |
| 20. Lysosomal membrane permeabilization detections.....                    | 35 |
| 21. CCK-8 cell viability assays .....                                      | 36 |
| 22. Calcein-AM/PI double staining.....                                     | 36 |
| 23. Colony formation assays .....                                          | 36 |
| 24. HT-1080 cells invasion assay .....                                     | 37 |
| 25. Cell death rescue experiments .....                                    | 38 |
| 26 Intracellular lipid peroxidation assays.....                            | 39 |
| 27. Hemolysis analysis .....                                               | 39 |
| 28. In vivo antitumor therapy .....                                        | 40 |

## 1. Experimental materials

5,10,15,20-tetrakis(4-formylphenyl)porphyrin and Bodipy-CHO were purchased from Jilin Chinese Academy of Sciences - Yanshen Technology Co., Ltd.

VC was purchased from Aladdin Reagent (Shanghai) Co., Ltd.

4-aminothiophenol and Glutathione (GSH) were purchased from Shanghai Macklin Biochemical Co., Ltd.

5,5',6,6'-tetrachloro-1,1',3,3'-tetraethylbenzimidazolylcarbocyanine iodide (JC-1), 2',7'-dichlorodihydrofluorescein diacetate (DCFH-DA), ferrostatin-1, liproxstatin-1, N-Acetyl-L-cysteine, rotenone, antimycin, and UK5099 were purchased from MedChemExpress (Shanghai, P. R. China).

MitoTracker Deep Red FM, BODIPY581/591 undecanoic acid (C<sub>11</sub>-BODIPY), and Trypan Blue were purchased from Invitrogen (Thermo Fisher Scientific Inc.).

Acridine Orange (AO), and Giemsa staining solution were purchased from Beijing Solarbio Science & Technology Co., Ltd.

The glutathione peroxidase assay kit and Bradford protein assay kit were purchased from Beyotime (Shanghai, P. R. China).

GSH assay kit was purchased from Nanjing Jiancheng Bioengineering Institute (P. R. China).

3-methyladenine (3-MA) was purchased from TCI (Shanghai) Development Co., Ltd.

Glutathione ethyl ester (GSH-OEt) was purchased from Sigma-Aldrich.

CCK-8 assay kit was purchased from Dojindo (Shanghai, P.R. China).

Paraformaldehyde (4 vol%) fix solution was purchased from Biosharp (Hefei, P. R. China).

Hematoxylin-eosin (H&E) staining kit, terminal deoxynucleotidyl transferase-mediated dUTP nick-end labeling (TUNEL) immunofluorescence assay kit, and Ki67 immunohistochemistry staining kit were purchased from Wuhan Servicebio Technology Co., Ltd.

Trypsin (0.25 wt%) and EDTA (0.02 wt%) in Puck's saline A (trypsin/EDTA solution), Phosphate-buffered saline (PBS), and Dulbecco's phosphate-buffered saline (DPBS) were purchased from Biological Industries USA, Inc.

Certified fetal bovine serum (FBS) was purchased from VivaCell (Shanghai, P. R. China).

Hank's balanced salt solution (HBSS), GlutaMAX (100×), and soybean trypsin inhibitor powder were purchased from Gibco (Thermo Fisher Scientific Inc.).

Dulbecco's modified eagle medium (MEM) was purchased from HyClone Laboratories, Inc.

Normocin was purchased from Invivogen (San Diego, CA, USA).

Mammary epithelial cell growth medium (MEGM) BulletKit was purchased from Lonza Walkersville, Inc.

Normal saline (NS) was purchased from Shandong Qidu Pharmaceutical Co. Ltd.

Chromatographically pure solvents, including acetonitrile, isopropanol, and methanol, were purchased from Merck KGaA, Darmstadt, Germany.

## 2. Cell culture and experimental animals

HT-1080 (human fibrosarcoma cells) cell lines were provided by the Institute of Basic

Medicine, Shandong Academy of Medical Sciences (Jinan, P. R. China). MCF-10A (human mammary epithelia) cell line was provided by Stem Cell Bank, Chinese Academy of Sciences (Shanghai, P. R. China).

HT-1080 cells were cultured in MEM supplemented with FBS (10 vol%), human recombinant insulin (10  $\mu\text{g}/\text{mL}$ ) and Normocin (100  $\mu\text{g}/\text{mL}$ ) in a 5 vol%  $\text{CO}_2$  atmosphere at 37  $^\circ\text{C}$ . MCF-10A cells were cultured using MEGM BulletKit supplemented with Normocin (100  $\mu\text{g}/\text{mL}$ ) in a 5 vol%  $\text{CO}_2$  atmosphere at 37  $^\circ\text{C}$ . Trypsin/EDTA solution was used to dissociate cells and FBS-containing culture media when necessary.

All animal procedures were reviewed and approved by the Shandong Normal University Ethics Committee (Jinan, P. R. China), application number AEECSDNAU2022050. All the animal experiments complied with relevant guidelines of the Chinese government and regulations for the care and use of experimental animals. Nude mice (BALB/cJGpt-Foxn1nu/Gpt, aged 4 weeks) were purchased from Hangzhou Ziyuan Laboratory Animal Technology Co., Ltd. The nude mice were housed in a pathogen-free facility and kept in a temperature-controlled room set to light and dark cycle of 12 h each. To establish the HT-1800 xenograft model, HT-1080 cells ( $5 \times 10^6$  cells) suspended in HBSS (40  $\mu\text{L}$ ) were subcutaneously injected into the flanks of each mouse. The length (L) and width (W) of the tumour were determined using digital calipers. The tumour volume (V) was calculated by the formula:  $V = 1/2 \times L \times W^2$ .

### 3. Experimental instrumentations

Fourier transform infrared (FT-IR) spectra were obtained in the 4000~400  $\text{cm}^{-1}$  range using a Thermo Scientific Nicolet iS50 FT-IR Spectrometer equipped with a diamond attenuated total reflection (ATR) module. Each spectrum was the average of 16 scans. Ultraviolet-visible (UV-vis) absorption spectra were recorded on a Shimadzu UV-2700 Double Beam UV-vis Spectrophotometer using 10 mm quartz cuvettes.

Ultraviolet-visible absorption spectra were recorded on a Shimadzu UV-2700 Double Beam UV-Vis Spectrophotometer.

Liquid-state  $^1\text{H}$  nuclear magnetic resonance (NMR) spectra were recorded using a Bruker AVANCE III HD 400 MHz NMR Spectrometer. Chemical shifts were reported as  $\delta$  values relative to tetramethylsilane (TMS) as an internal reference. The solid-state  $^{13}\text{C}$  cross-polarization magic angle spinning (CP-MAS) NMR spectra were recorded on a MERCURY plus 400 spectrometer operating at resonance frequencies of 400 MHz. Electron paramagnetic resonance (EPR) spectra were recorded on a Bruker A300 EPR Spectroscopy.

Inductively coupled plasma optical emission spectrometry (ICP-OES) measurements were carried out on a Thermo Scientific iCAP 7000 ICP-OES. The standard solutions were obtained from the Reference Materials Research Center of Shandong Metallurgical Research Institute (Jinan, P. R. China). Before each analysis, the external standard method was used to establish a working curve.

Powder X-ray diffraction (PXRD) patterns were obtained on a Rigaku SmartLab SE X-Ray Powder Diffractometer with Cu  $K\alpha$  line focused radiation ( $\lambda = 1.5405 \text{ \AA}$ ) from  $2\theta = 2.00^\circ$  up to  $30.00^\circ$  with  $0.01^\circ$  increment.

Nitrogen-adsorption isotherms were measured at 77 K with a Micromeritics ASAP2020 HD88 Surface Area and Porosity Analyser. Before measurement, the samples were degassed in a vacuum at 120 °C for 8 h. The Brunauer-Emmett-Teller (BET) equation was used to calculate the specific surface areas. The pore size distribution was derived from the sorption curve using the non-local density functional theory (NLDFT) model. Transmission electron microscopy (TEM) images were recorded on a Hitachi HT7700 120 kV Compact-Digital Transmission Electron Microscope. To prepare the TEM samples, the nanomaterial was dispersed in methanol by sonication for 5 min and the dispersions were placed on a carbon-coated copper TEM grid (300 mesh) and dried at room temperature.

Hydrodynamic particle size and Zeta potential were measured using Malvern Zetasizer Nano ZS90 System.

Microplate assays were carried out on a Molecular Devices SpectraMax i3x Multi-Mode Microplate Detection System.

Cell counting was performed on a Thermo Fisher Scientific Invitrogen Countess II Automated Cell Counter equipped with Countess Cell Counting Chamber Slides.

Photomicrographs of biological samples were taken with a Leica DMI3000 B Inverted Fluorescence Microscope with an objective lens (10×, 20×, and 40×).

Flow cytometry was analyzed on a BIO-RAD ZE5 Cell Analyzer.

Laser scanning confocal fluorescence images of cells were captured with a Leica TCS SP8 Confocal Laser Scanning Microscopy equipped with 405, 458, 488, 514, 561, and 633 nm lasers. Glass bottom dishes and 4/8-well chamber slides (Cellvis, Mountain View, CA, USA) were used for cell culture to provide biological replicates of each experiment. Before live-cell imaging, the original culture media or DPBS was replaced with HBSS supplemented with HEPES (15 mM) and GlutaMAX to provide better-buffering capacity under normal CO<sub>2</sub> concentration.

For imaging, the scan speed was 400 Hz and transmitted light was used to find the areas of interest to reduce photodamage to the biosample.

#### 4. Statistical analysis

As indicated in figure legends, all results are depicted as means ± SD of at least three biological replicates. And data were compared with the paired or unpaired two-tailed Student's t-test with or without Welch's correction, one-way ANOVA followed by Dunnett's or Tukey's posthoc tests, or two-way ANOVA followed by Šídák's post hoc test, as appropriate. \*p < 0.05, \*\*\*p < 0.001.

#### 5. Synthesis of 4,4'-(propane-2,2-diylbis(sulfaneydiyl))dianiline (TK)

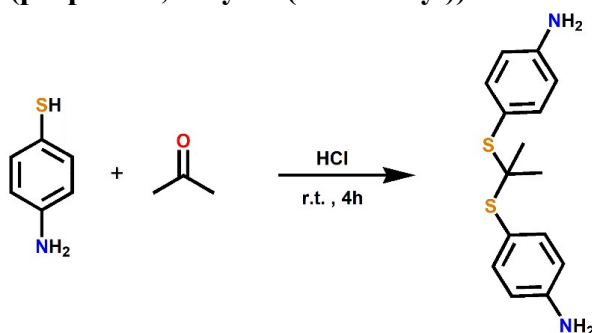

4-aminothiophenol (6.15 g, 49.1 mmol) and acetone (5.8 g, 98.2 mmol) were mixed with concentrated hydrochloric acid (10 mL) and stirred for 4 h at room temperature. After the reaction, the reaction solution was poured into a KOH solution (1 M, 200 mL), filtered and the resulting white solid was washed with deionized water until the filtrate was neutral. Yield, 91%.  $^1\text{H NMR}$  (400 MHz,  $\text{CDCl}_3$ )  $\delta$  = 7.37 (d,  $J$  = 8.5, 4H), 6.61 (d,  $J$  = 8.5, 4H), 3.74 (s, 4H), 1.42 (s, 6H). IR (KBr pellet  $\text{cm}^{-1}$ ): 3452 (s), 3434 (s), 3349 (s), 2949 (v), 1630 (s), 1589 (s), 1492 (s), 1426 (v), 1375 (v), 1360 (v), 1306 (m), 1279 (m), 1180 (m), 1103 (s), 824 (s), 586 (v), 512 (m).

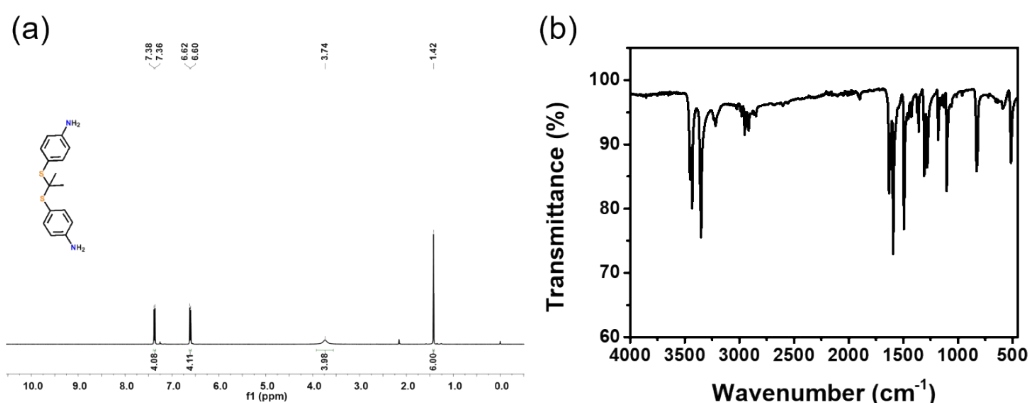

**Fig. S1** (a)  $^1\text{H NMR}$  of 4,4'-(propane-2,2-diylbis(sulfanediyl))dianiline. (b) FT-IR spectra of 4,4'-(propane-2,2-diylbis(sulfanediyl))dianiline.

## 6. Synthesis of TKPP-COF

5,10,15,20-tetrakis(4-formylphenyl)porphyrin (18.12 mg, 0.025 mmol), TK (14.50 mg, 0.05 mmol), 1.0 mL *o*-dichlorobenzene and 1.0 mL *n*-BuOH, and then the mixture was sonicated for 10 min, followed by slow addition of 0.25 mL of 6 M aqueous acetic acid. Afterward, the tube was flash-frozen at 77 K, degassed by three freeze-pump-thaw cycles, sealed under a vacuum, and heated at 120  $^{\circ}\text{C}$  for 3 days. After cooling down to room temperature, the tube was opened and the resulting precipitate was filtered off, thoroughly washed with *o*-dichlorobenzene, ethanol and acetone until the filtrate was colorless, and Soxhlet extractions with trichloromethane and dichloromethane for 24 h, respectively. Finally, the resulting dark violet powder was dried under vacuum at 70  $^{\circ}\text{C}$  overnight to give the TKPP-COF activated sample. Yield: 18.7 mg (61%).

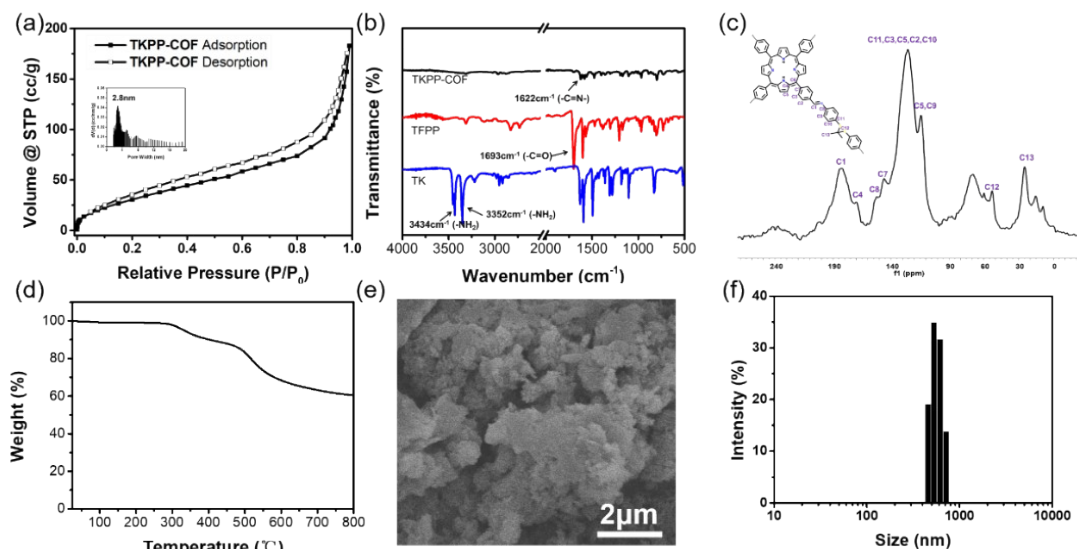

**Fig. S2** (a)  $N_2$  adsorption (solid square) and desorption (hollow square) isotherms of **TKPP-COF**. BET surface area of **TKPP-COF** =  $118.8 \text{ m}^2/\text{g}$ . The pore size distribution curve based on nonlocal density functional theory (NLDFT) analysis is shown as inset. The pore width of **TKPP-COF** was centered at 2.8 nm. (b) FT-IR spectra of **TKPP-COF** and its monomers. The peaks at 3434 and 3352  $\text{cm}^{-1}$  (for  $-\text{NH}_2$ ) in TK and 1693  $\text{cm}^{-1}$  (for  $-\text{CHO}$ ) in TFPP basically disappeared, and the peaks at 1622  $\text{cm}^{-1}$  (for  $-\text{C}=\text{N}-$ ) appeared. (c)  $^{13}\text{C}$  CP-MAS solid-state NMR spectrum of **TKPP-COF**.  $\text{C}_1$  is the carbon atom for the imine bond (184 ppm), and the carbon atoms in both monomers [TFPP ( $\text{C}_2-\text{C}_7$ ), TK ( $\text{C}_8-\text{C}_{11}$ )] are represented in **TKPP-COF**. (d) Thermogravimetric analysis (TGA) trace of **TKPP-COF**. (e) Scanning electron microscope (SEM) image of **TKPP-COF**. (f) Dynamic light scattering (DLS) measurements of **TKPP-COF**.

**Table S1.** Fractional Atomic Coordinates for the Unit Cell of **TKPP-COF**

**TKPP-COF** AA'A'' slip-stacked mode, space group:  $P1$

$a = 22.3641 \text{ \AA}$ ,  $b = 58.2951 \text{ \AA}$ ,  $c = 13.1505 \text{ \AA}$

$\alpha = 89.9726^\circ$ ,  $\beta = 89.9651^\circ$ ,  $\gamma = 89.9953^\circ$ ,  $R_{\text{wp}} = 1.38\%$  and  $R_{\text{p}} = 0.84\%$

| Atom | x       | y       | z        |
|------|---------|---------|----------|
| C1   | 0.16615 | 0.09696 | 0.00085  |
| N2   | 0.92411 | 0.08362 | 0.21099  |
| C3   | 0.82855 | 0.09426 | 0.22443  |
| H4   | 0.07239 | 0.08621 | 0.18273  |
| C5   | 0.32378 | 0.33279 | -0.1801  |
| C6   | 0.30295 | 0.31701 | -0.26715 |
| C7   | 0.36663 | 0.35061 | -0.22714 |
| H8   | 0.40045 | 0.342   | -0.27599 |
| H9   | 0.39207 | 0.36006 | -0.16844 |
| H10  | 0.34157 | 0.36309 | -0.2747  |
| H11  | 0.26552 | 0.30579 | -0.24353 |
| H12  | 0.34041 | 0.30607 | -0.29421 |
| H13  | 0.2864  | 0.32737 | -0.33234 |
| C14  | 0.31338 | 0.8387  | -0.12855 |
| C15  | 0.34893 | 0.82148 | -0.19367 |

|     |         |         |          |
|-----|---------|---------|----------|
| C16 | 0.28656 | 0.85666 | -0.20143 |
| H17 | 0.38052 | 0.83068 | -0.24467 |
| H18 | 0.31831 | 0.81102 | -0.24135 |
| H19 | 0.3763  | 0.80986 | -0.14589 |
| H20 | 0.26119 | 0.84806 | -0.26326 |
| H21 | 0.32242 | 0.86727 | -0.23627 |
| H22 | 0.25463 | 0.86813 | -0.16184 |
| H23 | 0.97032 | 0.08426 | 0.21375  |
| H24 | 0.53975 | 0.60414 | 0.15413  |
| H25 | 0.53328 | 0.56458 | 0.17069  |
| N26 | 0.00763 | 0.12023 | 0.15515  |
| N27 | 0.01444 | 1.04917 | 0.16307  |
| H28 | 0.75213 | 0.60698 | 0.23844  |
| C29 | 0.04663 | 0.15495 | 0.18992  |
| C30 | 0.05688 | 0.13366 | 0.1466   |
| C31 | 0.10965 | 0.12749 | 0.09332  |
| C32 | 0.12327 | 0.10424 | 0.07034  |
| N33 | 0.099   | 0.08581 | 0.11774  |
| C34 | 0.48622 | 0.51735 | 0.25317  |
| C35 | 0.47607 | 0.53819 | 0.20542  |
| C36 | 0.15089 | 0.14635 | 0.05915  |
| C37 | 0.21235 | 0.14574 | 0.08145  |
| C38 | 0.24934 | 0.16444 | 0.05731  |
| C39 | 0.22563 | 0.18419 | 0.01093  |
| C40 | 0.16461 | 0.18455 | -0.01383 |
| C41 | 0.12794 | 0.1659  | 0.00984  |
| C42 | 0.26419 | 0.20451 | -0.00735 |
| N43 | 0.24095 | 0.22391 | -0.03673 |
| C44 | 0.27156 | 0.24543 | -0.05164 |
| C45 | 0.33407 | 0.24712 | -0.06227 |
| C46 | 0.36126 | 0.26866 | -0.07343 |
| C47 | 0.3269  | 0.28879 | -0.07502 |
| C48 | 0.26475 | 0.28708 | -0.06291 |
| C49 | 0.23737 | 0.26559 | -0.054   |
| S50 | 0.36578 | 0.31639 | -0.08137 |
| C51 | 0.37256 | 0.59601 | 0.03752  |
| C52 | 0.41116 | 0.56585 | 0.11638  |
| N53 | 0.43719 | 0.58457 | 0.15746  |
| C54 | 0.4251  | 0.54314 | 0.14548  |
| C55 | 0.39106 | 0.52322 | 0.10344  |
| C56 | 0.32927 | 0.5206  | 0.11915  |
| C57 | 0.30043 | 0.50018 | 0.09024  |
| C58 | 0.33323 | 0.48202 | 0.04705  |
| C59 | 0.39445 | 0.48504 | 0.02899  |
| C60 | 0.42271 | 0.50544 | 0.05535  |
| C61 | 0.30424 | 0.4599  | 0.02188  |
| N62 | 0.33655 | 0.44148 | 0.01093  |

|      |         |         |          |
|------|---------|---------|----------|
| C63  | 0.31539 | 0.41907 | -0.01717 |
| C64  | 0.2643  | 0.41598 | -0.07787 |
| C65  | 0.24793 | 0.39398 | -0.11019 |
| C66  | 0.28221 | 0.3748  | -0.08315 |
| C67  | 0.33195 | 0.37777 | -0.01959 |
| C68  | 0.34925 | 0.39982 | 0.01083  |
| S69  | 0.25626 | 0.34652 | -0.1229  |
| H70  | 0.07728 | 0.16921 | 0.19604  |
| H71  | 0.19277 | 0.10772 | -0.04863 |
| H72  | 0.45507 | 0.50328 | 0.26234  |
| H73  | 0.23136 | 0.13111 | 0.12051  |
| H74  | 0.29621 | 0.16374 | 0.07764  |
| H75  | 0.14476 | 0.19941 | -0.0499  |
| H76  | 0.08106 | 0.16705 | -0.00829 |
| H77  | 0.31127 | 0.20331 | 0.01069  |
| H78  | 0.36206 | 0.23201 | -0.06271 |
| H79  | 0.40942 | 0.26968 | -0.0807  |
| H80  | 0.23722 | 0.30224 | -0.05919 |
| H81  | 0.18924 | 0.26466 | -0.04585 |
| H82  | 0.30392 | 0.53397 | 0.15676  |
| H83  | 0.25303 | 0.49825 | 0.1048   |
| H84  | 0.42079 | 0.47147 | -0.00449 |
| H85  | 0.47035 | 0.50694 | 0.04256  |
| H86  | 0.25598 | 0.45912 | 0.01614  |
| H87  | 0.23807 | 0.43051 | -0.10294 |
| H88  | 0.20869 | 0.39189 | -0.15746 |
| H89  | 0.35758 | 0.36312 | 0.00582  |
| H90  | 0.38904 | 0.40194 | 0.05674  |
| C91  | 0.99981 | 1.01594 | 0.24571  |
| C92  | 0.97383 | 1.03622 | 0.21342  |
| C93  | 0.91281 | 1.04183 | 0.22766  |
| C94  | 0.83058 | 1.07058 | 0.22556  |
| C95  | 0.89027 | 1.06443 | 0.21789  |
| C96  | 0.54421 | 0.65078 | 0.28739  |
| C97  | 0.57087 | 0.63077 | 0.25266  |
| C98  | 0.87268 | 1.02286 | 0.26125  |
| C99  | 0.85325 | 1.02164 | 0.36264  |
| C100 | 0.82996 | 1.00111 | 0.4016   |
| C101 | 0.82673 | 0.98138 | 0.3403   |
| C102 | 0.84248 | 0.98311 | 0.23707  |
| C103 | 0.86465 | 1.00372 | 0.19783  |
| C104 | 0.80897 | 0.95912 | 0.38571  |
| N105 | 0.81741 | 0.93996 | 0.33679  |
| C106 | 0.80247 | 0.91726 | 0.37219  |
| C107 | 0.76064 | 0.9134  | 0.45042  |
| C108 | 0.74554 | 0.89101 | 0.47899  |
| C109 | 0.77234 | 0.87216 | 0.43151  |



|      |         |         |          |
|------|---------|---------|----------|
| C110 | 0.8136  | 0.87585 | 0.35296  |
| C111 | 0.82822 | 0.89826 | 0.32322  |
| S112 | 0.74738 | 0.84343 | 0.46554  |
| C113 | 0.71278 | 0.57238 | 0.23847  |
| C114 | 0.65384 | 0.6029  | 0.25034  |
| N115 | 0.61794 | 0.58426 | 0.25244  |
| C116 | 0.63267 | 0.6257  | 0.26009  |
| C117 | 0.67481 | 0.64522 | 0.27906  |
| C118 | 0.7148  | 0.64495 | 0.36141  |
| C119 | 0.74836 | 0.66456 | 0.38569  |
| C120 | 0.74144 | 0.68498 | 0.32993  |
| C121 | 0.70259 | 0.68505 | 0.24605  |
| C122 | 0.67051 | 0.66532 | 0.22003  |
| C123 | 0.7738  | 0.70607 | 0.36146  |
| N124 | 0.75864 | 0.72611 | 0.32582  |
| C125 | 0.78514 | 0.74789 | 0.35208  |
| C126 | 0.84311 | 0.74984 | 0.39308  |
| C127 | 0.8668  | 0.77148 | 0.41648  |
| C128 | 0.83313 | 0.79144 | 0.4004   |
| C129 | 0.77628 | 0.78958 | 0.35645  |
| C130 | 0.75251 | 0.76799 | 0.33305  |
| S131 | 0.86692 | 0.81928 | 0.42777  |
| H132 | 0.97876 | 1.00199 | 0.28647  |
| H133 | 0.79263 | 1.05922 | 0.23413  |
| H134 | 0.5647  | 0.66434 | 0.33144  |
| H135 | 0.85932 | 1.03615 | 0.41297  |
| H136 | 0.81721 | 1.00032 | 0.48101  |
| H137 | 0.83952 | 0.96835 | 0.18735  |
| H138 | 0.87925 | 1.00436 | 0.11947  |
| H139 | 0.79184 | 0.95905 | 0.4627   |
| H140 | 0.73803 | 0.9275  | 0.48739  |
| H141 | 0.71226 | 0.88829 | 0.53754  |
| H142 | 0.83334 | 0.86146 | 0.31336  |
| H143 | 0.8595  | 0.90085 | 0.26138  |
| H144 | 0.71852 | 0.62985 | 0.40903  |
| H145 | 0.77821 | 0.66401 | 0.45047  |
| H146 | 0.69711 | 0.70035 | 0.20032  |
| H147 | 0.64028 | 0.66598 | 0.15588  |
| H148 | 0.80785 | 0.70462 | 0.41957  |
| H149 | 0.87064 | 0.73485 | 0.40542  |
| H150 | 0.91157 | 0.77271 | 0.44726  |
| H151 | 0.75059 | 0.80476 | 0.33885  |
| H152 | 0.70824 | 0.76692 | 0.30044  |
| H153 | 0.34336 | 0.56128 | -0.00471 |
| C154 | 0.81567 | 0.83125 | 0.52572  |
| C155 | 0.85013 | 0.84966 | 0.58585  |
| C156 | 0.79607 | 0.81252 | 0.60113  |

|      |         |         |          |
|------|---------|---------|----------|
| H157 | 0.7658  | 0.79992 | 0.56448  |
| H158 | 0.77123 | 0.82022 | 0.66591  |
| H159 | 0.8356  | 0.80323 | 0.63158  |
| H160 | 0.81964 | 0.85898 | 0.63831  |
| H161 | 0.87164 | 0.86226 | 0.53419  |
| H162 | 0.88634 | 0.84166 | 0.6316   |
| C163 | 0.0584  | 1.01671 | 0.21667  |
| C164 | 0.06614 | 1.03711 | 0.16414  |
| C165 | 0.11802 | 1.04309 | 0.1084   |
| C166 | 0.16923 | 1.07326 | 0.00493  |
| C167 | 0.12805 | 1.06601 | 0.07668  |
| C168 | 0.4865  | 0.65075 | 0.25167  |
| C169 | 0.47933 | 0.63066 | 0.19678  |
| C170 | 0.16038 | 1.02416 | 0.07919  |
| C171 | 0.22251 | 1.02597 | 0.09425  |
| C172 | 0.26004 | 1.00699 | 0.07713  |
| C173 | 0.23592 | 0.98576 | 0.04714  |
| C174 | 0.17422 | 0.98412 | 0.03043  |
| C175 | 0.13744 | 1.00312 | 0.04414  |
| C176 | 0.27446 | 0.96527 | 0.035    |
| N177 | 0.25036 | 0.94496 | 0.03178  |
| C178 | 0.28026 | 0.92331 | 0.01905  |
| C179 | 0.33769 | 0.92141 | -0.02397 |
| C180 | 0.36315 | 0.89975 | -0.03996 |
| C181 | 0.33164 | 0.87978 | -0.01433 |
| C182 | 0.27514 | 0.88167 | 0.03092  |
| C183 | 0.24938 | 0.90327 | 0.046    |
| S184 | 0.36631 | 0.85196 | -0.03621 |
| C185 | 0.37049 | 0.57236 | 0.04238  |
| C186 | 0.41416 | 0.603   | 0.10923  |
| C187 | 0.43024 | 0.62584 | 0.13267  |
| C188 | 0.3979  | 0.64577 | 0.08739  |
| C189 | 0.33552 | 0.64809 | 0.09499  |
| C190 | 0.3075  | 0.66831 | 0.06224  |
| C191 | 0.34153 | 0.68668 | 0.02419  |
| C192 | 0.40353 | 0.68408 | 0.01384  |
| C193 | 0.43121 | 0.66375 | 0.04388  |
| C194 | 0.31249 | 0.7087  | -0.00068 |
| N195 | 0.34204 | 0.72782 | 0.00836  |
| C196 | 0.31914 | 0.75057 | -0.00863 |
| C197 | 0.26829 | 0.75485 | -0.06884 |
| C198 | 0.24809 | 0.77734 | -0.08338 |
| C199 | 0.27871 | 0.79583 | -0.03984 |
| C200 | 0.32868 | 0.79162 | 0.02158  |
| C201 | 0.34918 | 0.76916 | 0.03581  |
| S202 | 0.25034 | 0.82476 | -0.05917 |
| H203 | 0.09125 | 1.00348 | 0.23117  |

|      |         |         |          |
|------|---------|---------|----------|
| H204 | 0.19823 | 1.06259 | -0.04093 |
| H205 | 0.45403 | 0.66433 | 0.26194  |
| H206 | 0.24177 | 1.04179 | 0.12227  |
| H207 | 0.3076  | 1.00866 | 0.09057  |
| H208 | 0.15406 | 0.96813 | 0.00637  |
| H209 | 0.09019 | 1.00094 | 0.03164  |
| H210 | 0.32252 | 0.96738 | 0.03279  |
| H211 | 0.36239 | 0.93645 | -0.04746 |
| H212 | 0.40711 | 0.89849 | -0.074   |
| H213 | 0.25089 | 0.86651 | 0.05404  |
| H214 | 0.20513 | 0.90444 | 0.07911  |
| H215 | 0.30884 | 0.63464 | 0.12924  |
| H216 | 0.25956 | 0.67002 | 0.07046  |
| H217 | 0.43071 | 0.69786 | -0.01641 |
| H218 | 0.4793  | 0.66236 | 0.03721  |
| H219 | 0.26532 | 0.70869 | -0.01864 |
| H220 | 0.24449 | 0.74102 | -0.10566 |
| H221 | 0.20888 | 0.78039 | -0.12972 |
| H222 | 0.3518  | 0.80568 | 0.05809  |
| H223 | 0.38821 | 0.76616 | 0.08269  |
| H224 | 0.75172 | 0.56146 | 0.23228  |
| H225 | 0.34709 | 0.60671 | -0.01386 |
| C226 | 0.70673 | 0.33085 | 0.46346  |
| C227 | 0.71633 | 0.31404 | 0.55108  |
| C228 | 0.66827 | 0.35073 | 0.50378  |
| H229 | 0.65165 | 0.36173 | 0.44108  |
| H230 | 0.62819 | 0.34398 | 0.54398  |
| H231 | 0.69424 | 0.36143 | 0.55796  |
| H232 | 0.74121 | 0.32224 | 0.61452  |
| C233 | 0.98611 | 0.15424 | 0.2276   |
| C234 | 0.9649  | 0.13257 | 0.20366  |
| C235 | 0.90548 | 0.12514 | 0.22215  |
| C236 | 0.88708 | 0.10191 | 0.21605  |
| C237 | 0.54565 | 0.51689 | 0.27857  |
| C238 | 0.57016 | 0.5376  | 0.24798  |
| C239 | 0.86117 | 0.14301 | 0.25162  |
| C240 | 0.84268 | 0.14516 | 0.35318  |
| C241 | 0.81106 | 0.16466 | 0.3849   |
| C242 | 0.79861 | 0.18246 | 0.31596  |
| C243 | 0.81447 | 0.17968 | 0.21326  |
| C244 | 0.84487 | 0.16002 | 0.18132  |
| C245 | 0.77109 | 0.20405 | 0.35232  |
| N246 | 0.77843 | 0.22299 | 0.30145  |
| C247 | 0.75469 | 0.24522 | 0.32674  |
| C248 | 0.70403 | 0.24808 | 0.38919  |
| C249 | 0.67932 | 0.26992 | 0.40346  |
| C250 | 0.70475 | 0.28914 | 0.35629  |

|      |         |          |         |
|------|---------|----------|---------|
| C251 | 0.7559  | 0.28642  | 0.29641 |
| C252 | 0.78056 | 0.26461  | 0.28143 |
| S253 | 0.66558 | 0.31648  | 0.35941 |
| C254 | 0.71302 | 0.59608  | 0.242   |
| C255 | 0.65348 | 0.56561  | 0.2449  |
| C256 | 0.63213 | 0.54275  | 0.24887 |
| C257 | 0.67424 | 0.52298  | 0.25859 |
| C258 | 0.71183 | 0.52093  | 0.34347 |
| C259 | 0.73979 | 0.49997  | 0.36528 |
| C260 | 0.72932 | 0.48057  | 0.30429 |
| C261 | 0.6949  | 0.48306  | 0.21564 |
| C262 | 0.66862 | 0.50417  | 0.1921  |
| C263 | 0.75195 | 0.45784  | 0.3371  |
| N264 | 0.73439 | 0.43909  | 0.29218 |
| C265 | 0.74858 | 0.41581  | 0.32077 |
| C266 | 0.78944 | 0.4103   | 0.39874 |
| C267 | 0.79877 | 0.38742  | 0.42691 |
| C268 | 0.76742 | 0.3697   | 0.37894 |
| C269 | 0.72878 | 0.37496  | 0.29839 |
| C270 | 0.71926 | 0.39785  | 0.27004 |
| S271 | 0.78161 | 0.34018  | 0.41745 |
| H272 | 0.96287 | 0.16794  | 0.26661 |
| H273 | 0.78866 | 0.10464  | 0.23164 |
| H274 | 0.56889 | 0.50242  | 0.31098 |
| H275 | 0.85518 | 0.13228  | 0.40862 |
| H276 | 0.79884 | 0.16634  | 0.46426 |
| H277 | 0.80449 | 0.19291  | 0.158   |
| H278 | 0.85794 | 0.15851  | 0.1025  |
| H279 | 0.74812 | 0.20408  | 0.4248  |
| H280 | 0.68204 | 0.23351  | 0.42375 |
| H281 | 0.63958 | 0.27184  | 0.44959 |
| H282 | 0.77536 | 0.30104  | 0.25867 |
| H283 | 0.81909 | 0.26272  | 0.23222 |
| H284 | 0.71645 | 0.53505  | 0.39637 |
| H285 | 0.76672 | 0.49855  | 0.43342 |
| H286 | 0.68695 | 0.46859  | 0.1659  |
| H287 | 0.6402  | 0.50541  | 0.12562 |
| H288 | 0.77992 | 0.45719  | 0.40398 |
| H289 | 0.81438 | 0.42337  | 0.43845 |
| H290 | 0.83007 | 0.3835   | 0.48723 |
| H291 | 0.70574 | 0.36138  | 0.25825 |
| H292 | 0.68831 | 0.40166  | 0.20902 |
| N293 | 0.52692 | 0.55077  | 0.20637 |
| N294 | 0.53048 | 0.61833  | 0.19946 |
| C295 | 0.04119 | 0.0001   | 0.46849 |
| N296 | 0.82067 | -0.00981 | 0.75798 |
| C297 | 0.73794 | 0.00273  | 0.83594 |

|      |          |          |         |
|------|----------|----------|---------|
| H298 | -0.08762 | -0.00957 | 0.57274 |
| C299 | 0.14165  | 0.2379   | 0.26424 |
| C300 | 0.10053  | 0.22162  | 0.20415 |
| C301 | 0.17067  | 0.25433  | 0.18718 |
| H302 | 0.19188  | 0.24432  | 0.12538 |
| H303 | 0.20652  | 0.26476  | 0.22252 |
| H304 | 0.13675  | 0.26597  | 0.15323 |
| H305 | 0.07088  | 0.21165  | 0.25514 |
| H306 | 0.12748  | 0.20954  | 0.15779 |
| H307 | 0.07087  | 0.23149  | 0.15235 |
| C308 | 0.14211  | 0.74127  | 0.20186 |
| C309 | 0.20839  | 0.7375   | 0.17682 |
| C310 | 0.11797  | 0.76007  | 0.13045 |
| H311 | 0.23313  | 0.75402  | 0.1799  |
| H312 | 0.21264  | 0.73027  | 0.09938 |
| H313 | 0.23045  | 0.72578  | 0.23122 |
| H314 | 0.12078  | 0.75433  | 0.04999 |
| H315 | 0.14423  | 0.77616  | 0.13679 |
| H316 | 0.07032  | 0.76373  | 0.14749 |
| H317 | 0.86337  | -0.01022 | 0.72742 |
| H318 | 0.39485  | 0.51024  | 0.63014 |
| H319 | 0.39721  | 0.47009  | 0.6306  |
| N320 | -0.10858 | 0.02541  | 0.65265 |
| N321 | -0.11528 | 0.9542   | 0.64575 |
| H322 | 0.55865  | 0.51657  | 0.8742  |
| C323 | -0.08178 | 0.0619   | 0.62459 |
| C324 | -0.06992 | 0.0391   | 0.60168 |
| C325 | -0.02221 | 0.03151  | 0.53854 |
| C326 | -0.00938 | 0.00798  | 0.51934 |
| N327 | -0.0441  | -0.01012 | 0.54599 |
| C328 | 0.33447  | 0.42267  | 0.67128 |
| C329 | 0.33842  | 0.44312  | 0.6174  |
| C330 | 0.01817  | 0.04956  | 0.49557 |
| C331 | 0.07801  | 0.05117  | 0.52703 |
| C332 | 0.11277  | 0.07024  | 0.5005  |
| C333 | 0.08755  | 0.0884   | 0.44534 |
| C334 | 0.02846  | 0.08645  | 0.41069 |
| C335 | -0.00533 | 0.06696  | 0.43342 |
| C336 | 0.1221   | 0.1096   | 0.42777 |
| N337 | 0.09448  | 0.12911  | 0.41865 |
| C338 | 0.12252  | 0.1509   | 0.40101 |
| C339 | 0.17497  | 0.15298  | 0.34268 |
| C340 | 0.19833  | 0.1747   | 0.32067 |
| C341 | 0.16975  | 0.19453  | 0.35618 |
| C342 | 0.11848  | 0.19242  | 0.41675 |
| C343 | 0.09435  | 0.17076  | 0.43706 |
| S344 | 0.20332  | 0.22237  | 0.33005 |

|      |          |         |         |
|------|----------|---------|---------|
| C345 | 0.28342  | 0.50024 | 0.38776 |
| C346 | 0.30281  | 0.47049 | 0.48733 |
| N347 | 0.31364  | 0.48947 | 0.54306 |
| C348 | 0.30739  | 0.44794 | 0.52589 |
| C349 | 0.2776   | 0.42854 | 0.47192 |
| C350 | 0.2158   | 0.42897 | 0.45323 |
| C351 | 0.18633  | 0.40924 | 0.41891 |
| C352 | 0.21798  | 0.38869 | 0.40393 |
| C353 | 0.28029  | 0.38863 | 0.41732 |
| C354 | 0.30977  | 0.40841 | 0.45021 |
| C355 | 0.18491  | 0.36731 | 0.38113 |
| N356 | 0.21079  | 0.34739 | 0.38975 |
| C357 | 0.18306  | 0.32525 | 0.37756 |
| C358 | 0.12623  | 0.32233 | 0.33299 |
| C359 | 0.1005   | 0.30049 | 0.3269  |
| C360 | 0.13122  | 0.28126 | 0.36333 |
| C361 | 0.18788  | 0.28402 | 0.407   |
| C362 | 0.21376  | 0.30584 | 0.41315 |
| S363 | 0.09502  | 0.25334 | 0.35959 |
| H364 | -0.05788 | 0.07707 | 0.60071 |
| H365 | 0.07706  | 0.01025 | 0.43681 |
| H366 | 0.30469  | 0.40839 | 0.6573  |
| H367 | 0.09714  | 0.03796 | 0.57453 |
| H368 | 0.15838  | 0.07132 | 0.52716 |
| H369 | 0.00799  | 0.10027 | 0.36819 |
| H370 | -0.05152 | 0.06624 | 0.40942 |
| H371 | 0.1705   | 0.10894 | 0.42969 |
| H372 | 0.19706  | 0.13795 | 0.31244 |
| H373 | 0.23881  | 0.17611 | 0.27597 |
| H374 | 0.09693  | 0.20749 | 0.44757 |
| H375 | 0.05372  | 0.16941 | 0.48147 |
| H376 | 0.18994  | 0.44422 | 0.46992 |
| H377 | 0.13829  | 0.40974 | 0.40863 |
| H378 | 0.30595  | 0.37312 | 0.40582 |
| H379 | 0.35734  | 0.40766 | 0.46482 |
| H380 | 0.13754  | 0.36857 | 0.36573 |
| H381 | 0.10145  | 0.33667 | 0.30243 |
| H382 | 0.05656  | 0.29854 | 0.29346 |
| H383 | 0.21169  | 0.26933 | 0.43687 |
| H384 | 0.25746  | 0.30773 | 0.44765 |
| C385 | 0.86421  | 0.91782 | 0.68932 |
| C386 | 0.8487   | 0.94067 | 0.70292 |
| C387 | 0.80115  | 0.94828 | 0.76626 |
| C388 | 0.73599  | 0.97915 | 0.83423 |
| C389 | 0.78731  | 0.97171 | 0.78496 |
| C390 | 0.35704  | 0.55688 | 0.74606 |
| C391 | 0.39184  | 0.53723 | 0.73902 |

|      |         |         |         |
|------|---------|---------|---------|
| C392 | 0.76257 | 0.93021 | 0.81345 |
| C393 | 0.76218 | 0.92691 | 0.91919 |
| C394 | 0.7347  | 0.90751 | 0.96147 |
| C395 | 0.70722 | 0.8911  | 0.8987  |
| C396 | 0.70441 | 0.89519 | 0.79345 |
| C397 | 0.73107 | 0.91474 | 0.75164 |
| C398 | 0.68242 | 0.86983 | 0.94382 |
| N399 | 0.66759 | 0.85252 | 0.88654 |
| C400 | 0.64216 | 0.83107 | 0.91983 |
| C401 | 0.61355 | 0.82853 | 1.0147  |
| C402 | 0.5853  | 0.80786 | 1.03994 |
| C403 | 0.58559 | 0.78939 | 0.97186 |
| C404 | 0.61432 | 0.79176 | 0.87784 |
| C405 | 0.64237 | 0.81246 | 0.85214 |
| S406 | 0.54065 | 0.76417 | 1.00011 |
| C407 | 0.52767 | 0.48161 | 0.84538 |
| C408 | 0.46938 | 0.51109 | 0.80498 |
| N409 | 0.43915 | 0.49181 | 0.77988 |
| C410 | 0.44641 | 0.5336  | 0.79148 |
| C411 | 0.48138 | 0.5545  | 0.82236 |
| C412 | 0.50889 | 0.55664 | 0.91813 |
| C413 | 0.53827 | 0.577   | 0.94528 |
| C414 | 0.53682 | 0.59616 | 0.88086 |
| C415 | 0.50948 | 0.59407 | 0.78553 |
| C416 | 0.48464 | 0.57327 | 0.75503 |
| C417 | 0.56325 | 0.61821 | 0.91347 |
| N418 | 0.54932 | 0.63705 | 0.86612 |
| C419 | 0.57184 | 0.65961 | 0.88745 |
| C420 | 0.62773 | 0.66328 | 0.93372 |
| C421 | 0.64901 | 0.68564 | 0.94815 |
| C422 | 0.61461 | 0.7045  | 0.91753 |
| C423 | 0.55947 | 0.70087 | 0.86997 |
| C424 | 0.53825 | 0.67857 | 0.85531 |
| S425 | 0.64328 | 0.73343 | 0.9333  |
| H426 | 0.84534 | 0.90285 | 0.72593 |
| H427 | 0.7001  | 0.96871 | 0.86433 |
| H428 | 0.36202 | 0.5708  | 0.79982 |
| H429 | 0.78509 | 0.93889 | 0.96853 |
| H430 | 0.73671 | 0.90493 | 1.04298 |
| H431 | 0.68254 | 0.88312 | 0.74317 |
| H432 | 0.7298  | 0.91729 | 0.67029 |
| H433 | 0.67918 | 0.86865 | 1.02575 |
| H434 | 0.61078 | 0.8426  | 1.06795 |
| H435 | 0.56193 | 0.80639 | 1.11178 |
| H436 | 0.61341 | 0.77788 | 0.82329 |
| H437 | 0.6634  | 0.81419 | 0.77832 |
| H438 | 0.50703 | 0.54281 | 0.97269 |

|      |          |         |         |
|------|----------|---------|---------|
| H439 | 0.56079  | 0.57808 | 1.01766 |
| H440 | 0.50764  | 0.60847 | 0.73384 |
| H441 | 0.46588  | 0.57214 | 0.67927 |
| H442 | 0.5922   | 0.61856 | 0.97944 |
| H443 | 0.65542  | 0.649   | 0.95652 |
| H444 | 0.69219  | 0.68832 | 0.98325 |
| H445 | 0.53305  | 0.71532 | 0.84434 |
| H446 | 0.49554  | 0.676   | 0.81827 |
| H447 | 0.27125  | 0.46523 | 0.3293  |
| C448 | 0.59903  | 0.74382 | 1.04448 |
| C449 | 0.64245  | 0.75552 | 1.11851 |
| C450 | 0.56675  | 0.72447 | 1.10255 |
| H451 | 0.53032  | 0.71691 | 1.05623 |
| H452 | 0.54577  | 0.7313  | 1.17295 |
| H453 | 0.59855  | 0.71074 | 1.12479 |
| H454 | 0.61752  | 0.76413 | 1.18087 |
| H455 | 0.67042  | 0.76848 | 1.07896 |
| H456 | 0.67326  | 0.74264 | 1.15219 |
| C457 | -0.08961 | 0.91737 | 0.6215  |
| C458 | -0.07747 | 0.93996 | 0.59583 |
| C459 | -0.03001 | 0.94673 | 0.53093 |
| C460 | 0.03849  | 0.97654 | 0.46356 |
| C461 | -0.01325 | 0.96978 | 0.5128  |
| C462 | 0.31775  | 0.55642 | 0.66561 |
| C463 | 0.32904  | 0.53634 | 0.61258 |
| C464 | 0.00653  | 0.92808 | 0.48508 |
| C465 | 0.06126  | 0.92171 | 0.52892 |
| C466 | 0.09038  | 0.90169 | 0.4972  |
| C467 | 0.06445  | 0.88747 | 0.42307 |
| C468 | 0.0108   | 0.8944  | 0.37653 |
| C469 | -0.01757 | 0.91465 | 0.40676 |
| C470 | 0.09156  | 0.86488 | 0.40082 |
| N471 | 0.05912  | 0.84833 | 0.36395 |
| C472 | 0.07832  | 0.82502 | 0.3491  |
| C473 | 0.13883  | 0.81896 | 0.3358  |
| C474 | 0.15523  | 0.79583 | 0.32832 |
| C475 | 0.11186  | 0.77859 | 0.33437 |
| C476 | 0.05167  | 0.78457 | 0.34518 |
| C477 | 0.03499  | 0.80765 | 0.35063 |
| S478 | 0.13397  | 0.74863 | 0.33907 |
| C479 | 0.28361  | 0.47659 | 0.39086 |
| C480 | 0.30192  | 0.50768 | 0.48282 |
| C481 | 0.30451  | 0.53069 | 0.51663 |
| C482 | 0.28004  | 0.54967 | 0.45257 |
| C483 | 0.22056  | 0.54924 | 0.41856 |
| C484 | 0.19639  | 0.5681  | 0.36698 |
| C485 | 0.23072  | 0.58794 | 0.35054 |



|      |          |         |         |
|------|----------|---------|---------|
| C486 | 0.29071  | 0.58818 | 0.38207 |
| C487 | 0.31525  | 0.56914 | 0.43177 |
| C488 | 0.20244  | 0.60831 | 0.30363 |
| N489 | 0.22343  | 0.62884 | 0.31917 |
| C490 | 0.19659  | 0.64964 | 0.28144 |
| C491 | 0.16302  | 0.65013 | 0.19111 |
| C492 | 0.13549  | 0.67046 | 0.15934 |
| C493 | 0.14102  | 0.69069 | 0.21613 |
| C494 | 0.17456  | 0.69019 | 0.30643 |
| C495 | 0.20321  | 0.66995 | 0.33732 |
| S496 | 0.0964   | 0.71531 | 0.17467 |
| H497 | -0.06657 | 0.90206 | 0.59648 |
| H498 | 0.07202  | 0.96561 | 0.4293  |
| H499 | 0.28612  | 0.56976 | 0.6461  |
| H500 | 0.08006  | 0.93174 | 0.59043 |
| H501 | 0.13164  | 0.89669 | 0.53424 |
| H502 | -0.01    | 0.8839  | 0.31876 |
| H503 | -0.05982 | 0.91935 | 0.37265 |
| H504 | 0.13675  | 0.8616  | 0.4266  |
| H505 | 0.17333  | 0.83193 | 0.33128 |
| H506 | 0.20166  | 0.79123 | 0.31882 |
| H507 | 0.01786  | 0.77134 | 0.35051 |
| H508 | -0.01168 | 0.81203 | 0.35935 |
| H509 | 0.19233  | 0.53458 | 0.43448 |
| H510 | 0.15005  | 0.56751 | 0.34321 |
| H511 | 0.31843  | 0.60314 | 0.36919 |
| H512 | 0.36139  | 0.56982 | 0.45668 |
| H513 | 0.1605   | 0.60599 | 0.26376 |
| H514 | 0.15815  | 0.63492 | 0.14476 |
| H515 | 0.10905  | 0.67037 | 0.0904  |
| H516 | 0.17768  | 0.70505 | 0.35477 |
| H517 | 0.22875  | 0.66987 | 0.40726 |
| H518 | 0.5649   | 0.4714  | 0.87211 |
| H519 | 0.2706   | 0.51069 | 0.32339 |
| C520 | 0.67757  | 0.24398 | 1.01066 |
| C521 | 0.72179  | 0.2265  | 1.05358 |
| C522 | 0.65132  | 0.25754 | 1.10007 |
| H523 | 0.61436  | 0.26886 | 1.07448 |
| H524 | 0.63278  | 0.24566 | 1.15824 |
| H525 | 0.68631  | 0.2682  | 1.13632 |
| H526 | 0.76009  | 0.23515 | 1.09123 |
| C527 | 0.8713   | 0.06206 | 0.69083 |
| C528 | 0.85534  | 0.03939 | 0.70712 |
| C529 | 0.80728  | 0.03239 | 0.77031 |
| C530 | 0.79027  | 0.00923 | 0.78733 |
| C531 | 0.378    | 0.42331 | 0.74472 |
| C532 | 0.40639  | 0.44434 | 0.73566 |

|      |         |         |         |
|------|---------|---------|---------|
| C533 | 0.77102 | 0.05108 | 0.81718 |
| C534 | 0.77946 | 0.05706 | 0.91959 |
| C535 | 0.75569 | 0.0776  | 0.95765 |
| C536 | 0.72448 | 0.09267 | 0.89331 |
| C537 | 0.71345 | 0.08604 | 0.7923  |
| C538 | 0.73589 | 0.0653  | 0.75498 |
| C539 | 0.70604 | 0.11556 | 0.9306  |
| N540 | 0.70026 | 0.13254 | 0.8671  |
| C541 | 0.68326 | 0.15569 | 0.89182 |
| C542 | 0.64722 | 0.161   | 0.97649 |
| C543 | 0.6277  | 0.18357 | 0.99252 |
| C544 | 0.6445  | 0.20108 | 0.92529 |
| C545 | 0.68099 | 0.19591 | 0.84194 |
| C546 | 0.69986 | 0.17334 | 0.82503 |
| S547 | 0.6151  | 0.22998 | 0.94112 |
| C548 | 0.52426 | 0.50523 | 0.84634 |
| C549 | 0.47485 | 0.47385 | 0.80307 |
| C550 | 0.45856 | 0.45064 | 0.78919 |
| C551 | 0.49735 | 0.43166 | 0.82684 |
| C552 | 0.50736 | 0.42812 | 0.93111 |
| C553 | 0.53626 | 0.40814 | 0.9649  |
| C554 | 0.55491 | 0.39132 | 0.89508 |
| C555 | 0.54654 | 0.39531 | 0.79063 |
| C556 | 0.51842 | 0.4153  | 0.75707 |
| C557 | 0.58228 | 0.36967 | 0.93146 |
| N558 | 0.58799 | 0.3523  | 0.87003 |
| C559 | 0.61479 | 0.33038 | 0.89177 |
| C560 | 0.65372 | 0.32682 | 0.97453 |
| C561 | 0.68306 | 0.30575 | 0.98602 |
| C562 | 0.67334 | 0.28788 | 0.91669 |
| C563 | 0.6343  | 0.2913  | 0.83508 |
| C564 | 0.60526 | 0.31239 | 0.82282 |
| S565 | 0.72001 | 0.26239 | 0.92097 |
| H566 | 0.85234 | 0.07731 | 0.72486 |
| H567 | 0.7039  | 0.01383 | 0.86756 |
| H568 | 0.38862 | 0.40961 | 0.79725 |
| H569 | 0.80691 | 0.04644 | 0.96846 |
| H570 | 0.76433 | 0.08231 | 1.03585 |
| H571 | 0.68881 | 0.09717 | 0.7414  |
| H572 | 0.72929 | 0.06102 | 0.67562 |
| H573 | 0.70172 | 0.11835 | 1.0117  |
| H574 | 0.63237 | 0.1477  | 1.02803 |
| H575 | 0.59881 | 0.18737 | 1.05641 |
| H576 | 0.69382 | 0.20929 | 0.78912 |
| H577 | 0.72717 | 0.16953 | 0.75914 |
| H578 | 0.49108 | 0.44036 | 0.98639 |
| H579 | 0.54245 | 0.4055  | 1.04575 |

|      |         |         |          |
|------|---------|---------|----------|
| H580 | 0.56098 | 0.38285 | 0.73471  |
| H581 | 0.511   | 0.41769 | 0.67638  |
| H582 | 0.59564 | 0.36835 | 1.01033  |
| H583 | 0.66367 | 0.34041 | 1.0278   |
| H584 | 0.71466 | 0.30349 | 1.04736  |
| H585 | 0.62784 | 0.27789 | 0.77925  |
| H586 | 0.57625 | 0.31495 | 0.75788  |
| N587 | 0.38156 | 0.45644 | 0.65883  |
| N588 | 0.37285 | 0.52442 | 0.65975  |
| C589 | 0.31212 | 0.09532 | -0.49771 |
| N590 | 1.09567 | 0.08106 | -0.21264 |
| C591 | 0.99959 | 0.09056 | -0.19201 |
| H592 | 0.23801 | 0.08453 | -0.29122 |
| C593 | 0.47624 | 0.32813 | -0.711   |
| C594 | 0.45104 | 0.30988 | -0.78394 |
| C595 | 0.52711 | 0.34071 | -0.76688 |
| H596 | 0.55984 | 0.3282  | -0.79804 |
| H597 | 0.55214 | 0.3522  | -0.715   |
| H598 | 0.50912 | 0.35106 | -0.83091 |
| H599 | 0.41031 | 0.3017  | -0.75232 |
| H600 | 0.485   | 0.29642 | -0.79953 |
| H601 | 0.43806 | 0.31788 | -0.85741 |
| C602 | 0.36253 | 0.82928 | -0.59052 |
| C603 | 0.43028 | 0.82481 | -0.58607 |
| C604 | 0.34893 | 0.84631 | -0.67693 |
| H605 | 0.45595 | 0.84099 | -0.59359 |
| H606 | 0.44418 | 0.81344 | -0.64956 |
| H607 | 0.44338 | 0.81687 | -0.5129  |
| H608 | 0.35915 | 0.83843 | -0.7519  |
| H609 | 0.37619 | 0.86215 | -0.67038 |
| H610 | 0.30089 | 0.85118 | -0.67584 |
| H611 | 1.14195 | 0.08231 | -0.21667 |
| H612 | 0.66694 | 0.60252 | -0.21787 |
| H613 | 0.69973 | 0.56197 | -0.26882 |
| N614 | 0.16917 | 0.11778 | -0.30846 |
| H615 | 0.84847 | 0.60669 | 0.01681  |
| C616 | 0.21462 | 0.15045 | -0.26248 |
| C617 | 0.21858 | 0.13075 | -0.3207  |
| C618 | 0.2652  | 0.12551 | -0.38908 |
| C619 | 0.27649 | 0.10246 | -0.41718 |
| N620 | 0.25768 | 0.08406 | -0.36303 |
| C621 | 0.65196 | 0.51139 | -0.25389 |
| C622 | 0.65006 | 0.53302 | -0.29781 |
| C623 | 0.30193 | 0.14488 | -0.43067 |
| C624 | 0.36476 | 0.14416 | -0.42977 |
| C625 | 0.39828 | 0.1634  | -0.4592  |
| C626 | 0.36972 | 0.18382 | -0.48885 |

|      |         |         |          |
|------|---------|---------|----------|
| C627 | 0.30701 | 0.18442 | -0.4914  |
| C628 | 0.27369 | 0.16513 | -0.46371 |
| C629 | 0.40581 | 0.20439 | -0.51398 |
| N630 | 0.38051 | 0.22423 | -0.52925 |
| C631 | 0.41061 | 0.24556 | -0.55097 |
| C632 | 0.47024 | 0.24652 | -0.58554 |
| C633 | 0.49816 | 0.2677  | -0.6014  |
| C634 | 0.46718 | 0.28819 | -0.58426 |
| C635 | 0.40747 | 0.28738 | -0.55215 |
| C636 | 0.37926 | 0.26619 | -0.53673 |
| S637 | 0.50717 | 0.31528 | -0.59246 |
| C638 | 0.57229 | 0.59157 | -0.50428 |
| C639 | 0.60433 | 0.56169 | -0.41567 |
| N640 | 0.61983 | 0.5807  | -0.36255 |
| C641 | 0.61457 | 0.53873 | -0.38391 |
| C642 | 0.58538 | 0.51926 | -0.44011 |
| C643 | 0.52304 | 0.51841 | -0.45346 |
| C644 | 0.49583 | 0.4988  | -0.49453 |
| C645 | 0.52989 | 0.47934 | -0.51883 |
| C646 | 0.59227 | 0.48033 | -0.50786 |
| C647 | 0.61965 | 0.50024 | -0.47122 |
| C648 | 0.49983 | 0.45834 | -0.55622 |
| N649 | 0.52684 | 0.43857 | -0.55362 |
| C650 | 0.50144 | 0.41715 | -0.58672 |
| C651 | 0.45919 | 0.41597 | -0.6658  |
| C652 | 0.43505 | 0.39479 | -0.69472 |
| C653 | 0.45269 | 0.37452 | -0.64593 |
| C654 | 0.49507 | 0.37568 | -0.56746 |
| C655 | 0.52013 | 0.39678 | -0.53971 |
| S656 | 0.41397 | 0.34795 | -0.67833 |
| H657 | 0.24721 | 0.16411 | -0.25651 |
| H658 | 0.33365 | 0.10615 | -0.55364 |
| H659 | 0.62628 | 0.49638 | -0.27409 |
| H660 | 0.38793 | 0.12897 | -0.40351 |
| H661 | 0.44663 | 0.16252 | -0.45627 |
| H662 | 0.28361 | 0.19991 | -0.51318 |
| H663 | 0.22541 | 0.16626 | -0.46484 |
| H664 | 0.45399 | 0.20277 | -0.51407 |
| H665 | 0.49554 | 0.23111 | -0.60069 |
| H666 | 0.54412 | 0.26817 | -0.62689 |
| H667 | 0.3832  | 0.30312 | -0.53759 |
| H668 | 0.33327 | 0.26582 | -0.511   |
| H669 | 0.49534 | 0.5327  | -0.43015 |
| H670 | 0.44798 | 0.49863 | -0.50625 |
| H671 | 0.61996 | 0.46578 | -0.52796 |
| H672 | 0.66768 | 0.50038 | -0.46153 |
| H673 | 0.45353 | 0.45946 | -0.58005 |

|      |         |         |          |
|------|---------|---------|----------|
| H674 | 0.44489 | 0.43129 | -0.70534 |
| H675 | 0.40172 | 0.3942  | -0.75429 |
| H676 | 0.50806 | 0.36046 | -0.52627 |
| H677 | 0.55296 | 0.39735 | -0.47928 |
| C678 | 0.73472 | 0.62856 | -0.22597 |
| C679 | 0.97991 | 0.99749 | -0.07135 |
| C680 | 0.98518 | 0.97797 | -0.13319 |
| C681 | 1.01841 | 0.9795  | -0.22346 |
| C682 | 0.95938 | 0.95583 | -0.09992 |
| N683 | 0.97769 | 0.93676 | -0.14096 |
| C684 | 0.95972 | 0.91377 | -0.11523 |
| C685 | 0.90946 | 0.90887 | -0.05439 |
| C686 | 0.89269 | 0.88611 | -0.03577 |
| C687 | 0.92753 | 0.86797 | -0.07307 |
| C688 | 0.97699 | 0.87279 | -0.13462 |
| C689 | 0.99274 | 0.89551 | -0.15589 |
| S690 | 0.90615 | 0.83825 | -0.05185 |
| C691 | 0.81928 | 0.57186 | -0.02052 |
| C692 | 0.77907 | 0.60136 | -0.10141 |
| N693 | 0.75329 | 0.58236 | -0.1402  |
| C694 | 0.77127 | 0.62372 | -0.14044 |
| C695 | 0.80384 | 0.64299 | -0.09077 |
| C696 | 0.78556 | 0.65056 | 0.00562  |
| C697 | 0.81099 | 0.67018 | 0.04862  |
| C698 | 0.85411 | 0.68284 | -0.00469 |
| C699 | 0.87535 | 0.6744  | -0.09813 |
| C700 | 0.85117 | 0.65435 | -0.13982 |
| C701 | 0.8741  | 0.70514 | 0.03661  |
| N702 | 0.90234 | 0.71981 | -0.02047 |
| C703 | 0.92129 | 0.74252 | 0.00822  |
| C704 | 0.9216  | 0.75022 | 0.1099   |
| C705 | 0.94129 | 0.77236 | 0.13317  |
| C706 | 0.96061 | 0.78716 | 0.05597  |
| C707 | 0.96085 | 0.77957 | -0.04487 |
| C708 | 0.94116 | 0.75742 | -0.0685  |
| S709 | 0.9936  | 0.81455 | 0.08908  |
| H710 | 0.92872 | 0.95571 | -0.03629 |
| H711 | 0.88248 | 0.92241 | -0.02262 |
| H712 | 0.85275 | 0.88259 | 0.00807  |
| H713 | 1.00317 | 0.85892 | -0.1665  |
| H714 | 1.03099 | 0.89894 | -0.20413 |
| H715 | 0.75049 | 0.64162 | 0.0464   |
| H716 | 0.79552 | 0.67597 | 0.12204  |
| H717 | 0.90985 | 0.68347 | -0.13966 |
| H718 | 0.86764 | 0.64821 | -0.21233 |
| H719 | 0.86048 | 0.70962 | 0.11296  |
| H720 | 0.90816 | 0.73925 | 0.17203  |

|      |         |         |          |
|------|---------|---------|----------|
| H721 | 0.94224 | 0.77791 | 0.21164  |
| H722 | 0.97713 | 0.79067 | -0.1048  |
| H723 | 0.94175 | 0.75175 | -0.14691 |
| H724 | 0.55808 | 0.55692 | -0.56281 |
| C725 | 0.92674 | 0.83343 | 0.08414  |
| C726 | 0.94366 | 0.85532 | 0.14258  |
| C727 | 0.8729  | 0.82241 | 0.13777  |
| H728 | 0.85572 | 0.8075  | 0.09421  |
| H729 | 0.83564 | 0.83492 | 0.14468  |
| H730 | 0.88573 | 0.81652 | 0.21481  |
| H731 | 0.90539 | 0.86734 | 0.14788  |
| H732 | 0.98249 | 0.86405 | 0.10684  |
| H733 | 0.95651 | 0.8508  | 0.22171  |
| C734 | 0.66129 | 0.62794 | -0.33504 |
| C735 | 0.36325 | 0.98595 | -0.43986 |
| C736 | 0.34854 | 0.96127 | -0.45718 |
| N737 | 0.38727 | 0.94385 | -0.46347 |
| C738 | 0.37234 | 0.91848 | -0.47134 |
| C739 | 0.41946 | 0.90263 | -0.46975 |
| C740 | 0.40814 | 0.87903 | -0.47074 |
| C741 | 0.34936 | 0.87088 | -0.47594 |
| C742 | 0.30193 | 0.88668 | -0.47806 |
| C743 | 0.31323 | 0.91038 | -0.47622 |
| S744 | 0.33347 | 0.84023 | -0.46697 |
| C745 | 0.57491 | 0.56803 | -0.50379 |
| C746 | 0.59863 | 0.59904 | -0.41487 |
| C747 | 0.60695 | 0.62231 | -0.38492 |
| C748 | 0.56276 | 0.64151 | -0.41329 |
| C749 | 0.50741 | 0.63731 | -0.4625  |
| C750 | 0.46969 | 0.65536 | -0.49269 |
| C751 | 0.48387 | 0.67818 | -0.46946 |
| C752 | 0.53416 | 0.68238 | -0.40931 |
| C753 | 0.57179 | 0.66443 | -0.37998 |
| C754 | 0.44605 | 0.6973  | -0.50747 |
| N755 | 0.45405 | 0.71825 | -0.47548 |
| C756 | 0.42263 | 0.7383  | -0.51116 |
| C757 | 0.39991 | 0.73986 | -0.61069 |
| C758 | 0.37111 | 0.75989 | -0.64331 |
| C759 | 0.36498 | 0.77878 | -0.57818 |
| C760 | 0.38678 | 0.77717 | -0.47842 |
| C761 | 0.4166  | 0.75727 | -0.4461  |
| S762 | 0.3193  | 0.80284 | -0.62141 |
| H763 | 0.46514 | 0.90868 | -0.46498 |
| H764 | 0.44513 | 0.8672  | -0.46431 |
| H765 | 0.2562  | 0.88059 | -0.48005 |
| H766 | 0.27611 | 0.92229 | -0.47719 |
| H767 | 0.49097 | 0.62023 | -0.47553 |

|      |         |         |          |
|------|---------|---------|----------|
| H768 | 0.42903 | 0.65141 | -0.53387 |
| H769 | 0.54449 | 0.6996  | -0.38399 |
| H770 | 0.60673 | 0.66902 | -0.32766 |
| H771 | 0.41133 | 0.6935  | -0.56234 |
| H772 | 0.40491 | 0.72581 | -0.6637  |
| H773 | 0.35309 | 0.76064 | -0.71965 |
| H774 | 0.37969 | 0.79103 | -0.42509 |
| H775 | 0.43381 | 0.75639 | -0.36926 |
| H776 | 0.84703 | 0.56162 | 0.02922  |
| H777 | 0.55622 | 0.60181 | -0.56701 |
| C778 | 0.88694 | 0.32665 | 0.09919  |
| C779 | 0.89587 | 0.30475 | 0.16088  |
| C780 | 0.8274  | 0.33765 | 0.13046  |
| H781 | 0.81642 | 0.3525  | 0.08103  |
| H782 | 0.79039 | 0.32516 | 0.12263  |
| H783 | 0.82953 | 0.34363 | 0.21042  |
| H784 | 0.89666 | 0.30836 | 0.24384  |
| C785 | 1.13448 | 0.1293  | -0.24193 |
| C786 | 1.07288 | 0.12233 | -0.21292 |
| C787 | 1.05684 | 0.09889 | -0.20656 |
| C788 | 0.69273 | 0.51217 | -0.17684 |
| C789 | 0.71605 | 0.53418 | -0.17564 |
| C790 | 1.02941 | 0.1412  | -0.18999 |
| C791 | 0.99545 | 0.14124 | -0.09996 |
| C792 | 0.96466 | 0.16106 | -0.06926 |
| C793 | 0.96769 | 0.18127 | -0.1273  |
| C794 | 0.99819 | 0.18071 | -0.22073 |
| C795 | 1.02819 | 0.16088 | -0.25199 |
| C796 | 0.94222 | 0.20304 | -0.08751 |
| N797 | 0.95934 | 0.22256 | -0.1258  |
| C798 | 0.94161 | 0.24537 | -0.09602 |
| C799 | 0.8908  | 0.25002 | -0.03581 |
| C800 | 0.87428 | 0.27283 | -0.01496 |
| C801 | 0.90884 | 0.29118 | -0.05197 |
| C802 | 0.95899 | 0.28644 | -0.11193 |
| C803 | 0.97523 | 0.26381 | -0.13346 |
| S804 | 0.8851  | 0.32107 | -0.04015 |
| C805 | 0.81968 | 0.59539 | -0.02631 |
| C806 | 0.7776  | 0.56429 | -0.0909  |
| C807 | 0.7628  | 0.5411  | -0.10946 |
| C808 | 0.79736 | 0.52242 | -0.05852 |
| C809 | 0.79457 | 0.51905 | 0.04705  |
| C810 | 0.81851 | 0.49912 | 0.0907   |
| C811 | 0.84298 | 0.48178 | 0.02925  |
| C812 | 0.84843 | 0.48572 | -0.07577 |
| C813 | 0.82669 | 0.50598 | -0.11882 |
| C814 | 0.85988 | 0.45941 | 0.07461  |

|      |         |          |          |
|------|---------|----------|----------|
| N815 | 0.87173 | 0.4419   | 0.01651  |
| C816 | 0.88695 | 0.41886  | 0.04685  |
| C817 | 0.88916 | 0.41166  | 0.1492   |
| C818 | 0.90659 | 0.38922  | 0.17327  |
| C819 | 0.92123 | 0.3736   | 0.09617  |
| C820 | 0.91813 | 0.38057  | -0.00547 |
| C821 | 0.90085 | 0.40298  | -0.02977 |
| S822 | 0.9512  | 0.3456   | 0.12987  |
| H823 | 0.95861 | 0.10029  | -0.18534 |
| H824 | 0.70387 | 0.49798  | -0.12723 |
| H825 | 0.99586 | 0.12649  | -0.05009 |
| H826 | 0.94175 | 0.16101  | 0.003    |
| H827 | 1.00046 | 0.19583  | -0.26842 |
| H828 | 1.05308 | 0.16128  | -0.32265 |
| H829 | 0.91268 | 0.20249  | -0.02231 |
| H830 | 0.86282 | 0.23629  | -0.00767 |
| H831 | 0.83393 | 0.27619  | 0.02803  |
| H832 | 0.98501 | 0.30037  | -0.14367 |
| H833 | 1.01394 | 0.26059  | -0.18089 |
| H834 | 0.77193 | 0.53139  | 0.095    |
| H835 | 0.81565 | 0.49679  | 0.17209  |
| H836 | 0.86801 | 0.4729   | -0.12518 |
| H837 | 0.82945 | 0.50825  | -0.20046 |
| H838 | 0.85985 | 0.45781  | 0.15648  |
| H839 | 0.87836 | 0.42314  | 0.21095  |
| H840 | 0.90935 | 0.38404  | 0.25222  |
| H841 | 0.93059 | 0.36887  | -0.06571 |
| H842 | 0.89935 | 0.40818  | -0.1088  |
| N843 | 0.68923 | 0.54697  | -0.249   |
| N844 | 0.68612 | 0.61636  | -0.25612 |
| C845 | 0.17754 | 0.01384  | -0.20395 |
| H846 | 0.16046 | -0.00047 | -0.16086 |
| N847 | 0.18329 | 0.04715  | -0.28833 |
| C848 | 1.14814 | 0.03404  | -0.22795 |
| C849 | 1.08754 | 0.03883  | -0.20338 |
| C850 | 1.00406 | 0.06702  | -0.18882 |
| C851 | 1.06373 | 0.06145  | -0.20294 |
| C852 | 1.04735 | 0.01874  | -0.18261 |
| C853 | 1.01111 | 0.01764  | -0.09528 |
| C854 | 1.04848 | -0.00029 | -0.24831 |
| H855 | 0.96703 | 0.0554   | -0.17795 |
| H856 | 1.00947 | 0.0319   | -0.04268 |
| H857 | 1.07515 | 0.00014  | -0.31698 |
| C858 | 0.23259 | 0.01476  | -0.24923 |
| C859 | 0.23463 | 0.03519  | -0.30291 |
| C860 | 0.28079 | 0.04176  | -0.37083 |
| C861 | 0.31675 | 0.07166  | -0.49303 |



|      |         |         |          |
|------|---------|---------|----------|
| C862 | 0.28355 | 0.06438 | -0.41002 |
| C863 | 0.32938 | 0.02498 | -0.39758 |
| C864 | 0.38943 | 0.03177 | -0.38827 |
| C865 | 0.43567 | 0.01628 | -0.40656 |
| C866 | 0.31678 | 0.00202 | -0.42597 |
| H867 | 0.26642 | 0.00154 | -0.24443 |
| H868 | 0.3424  | 0.06102 | -0.54449 |
| C869 | 0.16092 | 0.14967 | -0.21207 |
| C870 | 0.69664 | 0.64663 | 0.64079  |
| C871 | 0.74143 | 0.64757 | 0.7115   |
| H872 | 0.69012 | 0.65871 | 0.57938  |
| H873 | 0.7752  | 0.66077 | 0.71434  |
| C874 | 1.42296 | 0.99357 | 0.5685   |
| H875 | 1.39112 | 0.95368 | 0.53875  |
| H876 | 1.46001 | 0.98187 | 0.5574   |
| H877 | 1.27079 | 0.99646 | 0.5662   |
| H878 | 1.40064 | 1.04905 | 0.63515  |
| H879 | 1.4817  | 1.0218  | 0.60071  |
| H880 | 0.95437 | 0.99674 | 0.99839  |
| H881 | 1.02264 | 0.96486 | 0.72647  |

## 7. Model reaction

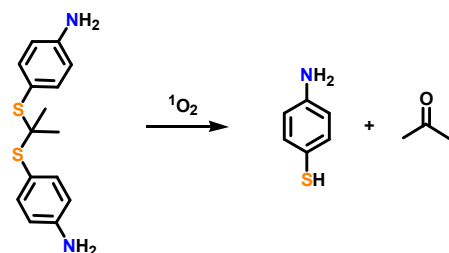

4,4'-(propane-2,2-diylbis(sulfaneyl))dianiline (TK) (290 mg, 1 mmol) dissolved in 5 mL ethanol, then 5 mL of dilute hydrochloric acid with pH = 3 was added. After addition of 1 mL (10 mM) of Protoporphyrin IX (PpIX, a typical type II photosensitizer) solution, the mixture was stirred at room temperature for 24 h under the irradiation of a 660 nm laser with a power of 600 mW/cm<sup>2</sup>. Then, the above reaction solution was poured into water, extracted three times with dichloromethane, and purified by column chromatography to afford 4-aminothiophenol in 96 % yield. <sup>1</sup>H NMR (400 MHz, CDCl<sub>3</sub>) δ = 7.11 (d, *J* = 8.5, 2H), 6.51 (d, *J* = 8.5, 2H), 3.63 (s, 2H), 3.32 (s, 1H). IR (KBr pellet cm<sup>-1</sup>): 3439 (m), 3359 (s), 3210 (m), 3026 (v), 2779 (m), 2550 (m), 1620 (s), 1595 (s), 1489 (vs), 1423 (v), 1402 (v), 1284 (s), 1204 (v), 1177 (m), 1120 (v), 1084 (v), 1007 (v), 818 (s), 755 (v), 690 (v), 631 (v), 502 (m).

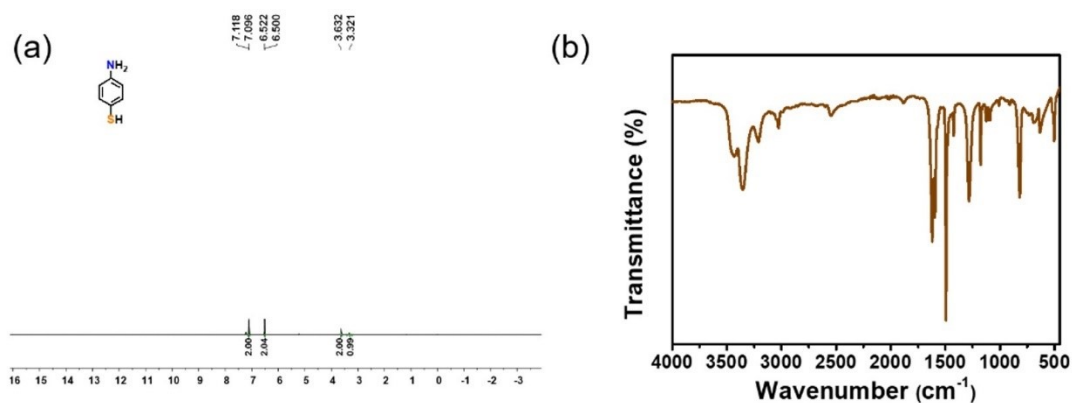

**Fig. S3** (a) <sup>1</sup>H NMR of 4-aminothiophenol. (b) FT-IR spectra of 4-aminothiophenol.

### 8. Single-line state oxygen detection

The single-linear oxygen specificity detection probe SOSG was used to detect the production of <sup>1</sup>O<sub>2</sub>. (2 μL, 2.5 mM) was added to 1 mL of PpIX (50 μM) and **TKPP-COF** (50 μg/mL), respectively. And then irradiated with a 660 nm laser with a power of 100 mW/cm<sup>2</sup> for different times. The excitation wavelength was set at 488 nm and the emission spectra were collected in the range of 500-600 nm. The rate of <sup>1</sup>O<sub>2</sub> production is determined by the enhancement of fluorescence over time. To characterize the difference in the rate of <sup>1</sup>O<sub>2</sub> introduced by different materials, the ratios F/F<sub>0</sub> of fluorescence intensity F and the initial fluorescence intensity F<sub>0</sub> at the maximum fluorescence intensity were calculated for different irradiation times and plotted as an ordinate of the irradiation time.

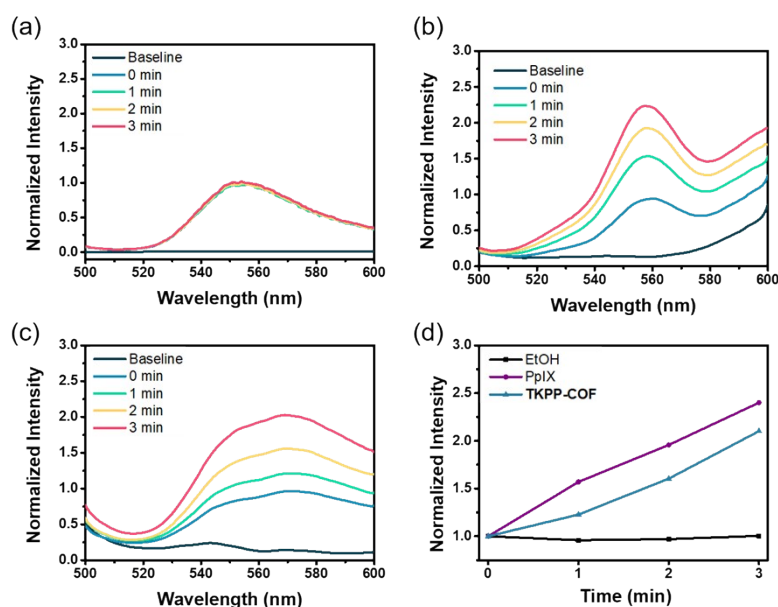

**Fig. S4** Changes in the fluorescence intensity of SOSG after different times of light exposure in different substances. (a) In EtOH. (b) In the PpIX solution. (c) In **TKPP-COF** dispersion. (d) Comparison of fluorescence changes of SOSG in different media.

### 9. Synthesis of nano TKPP-COF

The ethanol dispersion of **TKPP-COF** at a concentration of 1 mg/mL was irradiated with a 660 nm laser at a power of 100 mW/cm<sup>2</sup> for 24 h at room temperature and separated by vacuum filtration to obtain **nano TKPP-COF**.

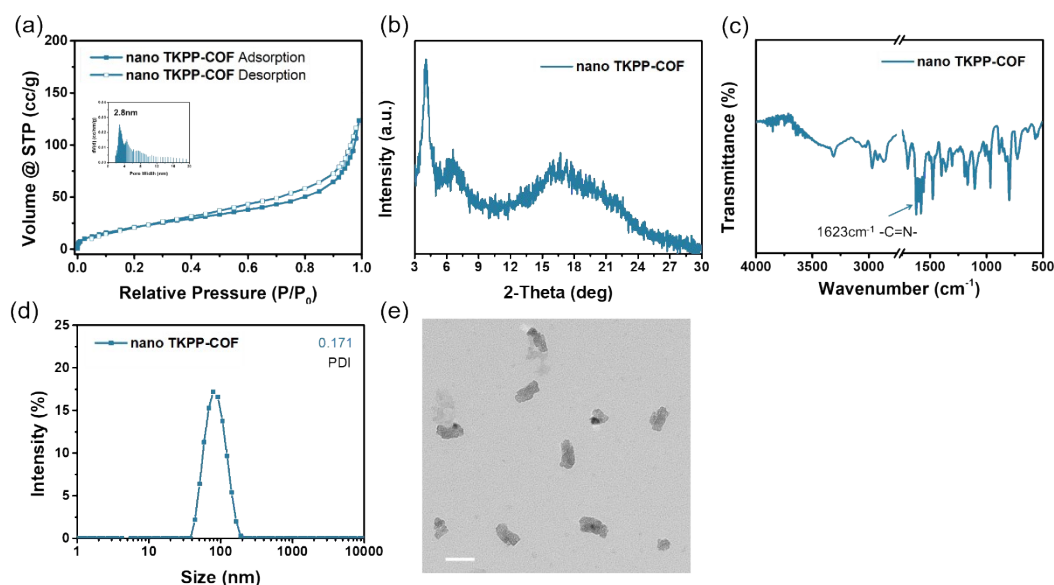

**Fig. S5** (a)  $N_2$  adsorption (solid square) and desorption (hollow square) isotherms of **nano TKPP-COF**. BET surface area of **nano TKPP-COF** =  $85.8 \text{ m}^2/\text{g}$ . The pore size distribution curve of **nano TKPP-COF** based on nonlocal density functional theory (NLDFT) analysis is shown as an inset. The pore width of **nano TKPP-COF** was centered at 2.8 nm. (b) PXRD patterns **nano TKPP-COF**. (c) FT-IR spectra of **nano TKPP-COF**. The peaks at  $1623 \text{ cm}^{-1}$  for  $-\text{C}=\text{N}-$ . (d) DLS plots and PDI of **nano TKPP-COF**. (e) Transmission electron microscope (TEM) image of **nano TKPP-COF**. Scale bar, 100 nm.

### 10. Synthesis of DC\_AC50@nano TKPP-COF

**nano TKPP-COF** (5 mg) was added into ethanol (5 mL, containing 0.1% DMSO) containing DC\_AC50 (5 mg), and then the suspension was sonicated for 10 min. After being stirred at  $25 \text{ }^\circ\text{C}$  and 800 rpm for 24 h, the solid particle was separated by vacuum filtration followed by washing with water 3 times. Finally, the product **DC\_AC50@nano TKPP-COF** was resuspended in water and stored at  $4 \text{ }^\circ\text{C}$  until use.

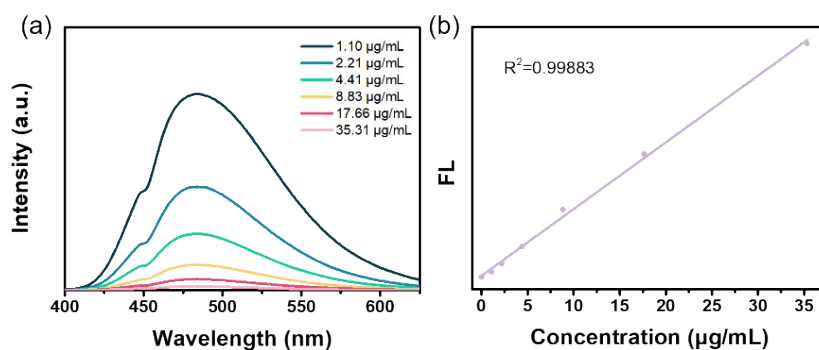

**Fig. S6** (a) Fluorescence spectra of different concentrations of DC\_AC50 in ethanol. (b) Standard curve of different concentrations of DC\_AC50 in ethanol.

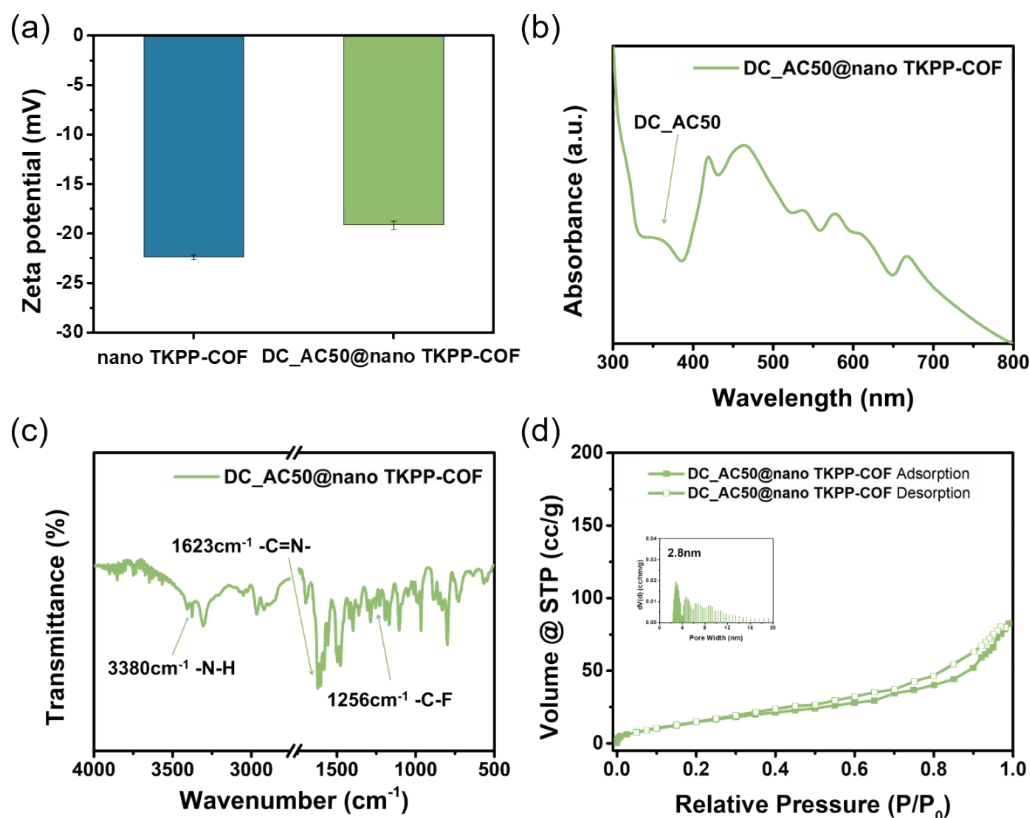

**Fig. S7** (a) Zeta potential of **nano TKPP-COF** and **DC\_AC50@nano TKPP-COF**. (b) Ultraviolet–visible (UV–vis) absorption spectrum of **DC\_AC50@nano TKPP-COF**. The UV absorption spectrum of **DC\_AC50@nano TKPP-COF** showed a **DC\_AC50** absorption peak at 358 nm. (c) FT-IR spectrum of **DC\_AC50@nano TKPP-COF**. C=N stretching vibration was found at 1623  $\text{cm}^{-1}$  for **DC\_AC50@nano TKPP-COF**, and the N-H stretching vibration associated with the amide bond in **DC\_AC50** was located at 3380  $\text{cm}^{-1}$ . (d)  $\text{N}_2$  adsorption (solid square) and desorption (hollow square) isotherms of **DC\_AC50@nano TKPP-COF**. BET surface area of **DC\_AC50@nano TKPP-COF** = 56.2  $\text{m}^2/\text{g}$ . The pore size distribution curve of **DC\_AC50@nano TKPP-COF** based on nonlocal density functional theory (NLDFT) analysis is shown as an inset. The pore width of **DC\_AC50@nano TKPP-COF** was centered at 2.8 nm.

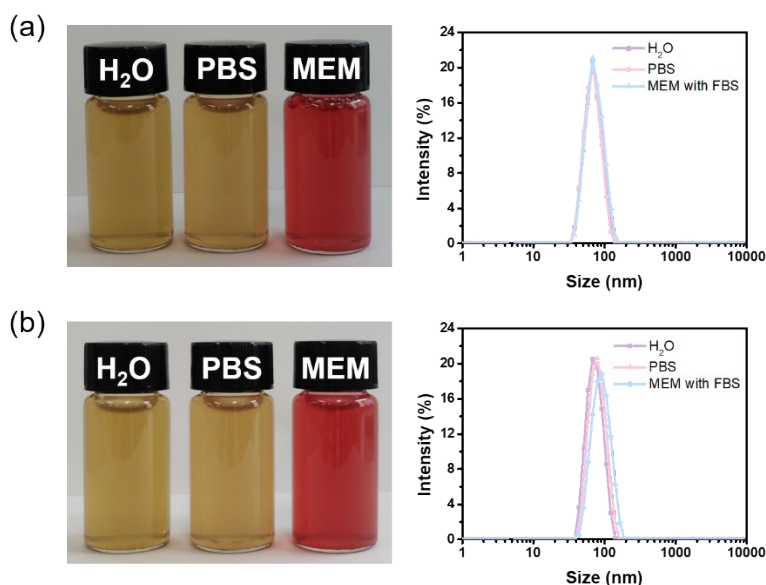

**Fig. S8** The stability of **DC\_AC50@nano TKPP-COF** in different physiological solutions ( $\text{H}_2\text{O}$ , PBS, and MEM with 10% fetal bovine serum). (a) 0 h. (b) 72 h.

### 11. EPR-trapping tests

As for the  $^1\text{O}_2$  trapping-EPR tests, the acetone dispersion of **nano TKPP-COF** or **DC\_AC50@nano TKPP-COF** (200  $\mu\text{L}$ , 50  $\mu\text{g}/\text{mL}$ ) and 10  $\mu\text{L}$  TEMP were added to a test tube, and irradiated with a red LED (50  $\text{mW}/\text{cm}^2$ ) for 120 s. After being illuminated, the mixture was characterized using a Bruker EMX plus model spectrometer operating at the X-band frequency (9.4 GHz) at room temperature.

### 12. Photodynamic property

The dispersion of **nano TKPP-COF** or **DC\_AC50@nano TKPP-COF** (2 mL, 50  $\mu\text{g}/\text{mL}$ ) and DPBF DMF solution (200  $\mu\text{L}$ , 1 mM) were added to a quartz dish and irradiated with a red LED (50  $\text{mW}/\text{cm}^2$ ) for 120 s. The absorbance of DPBF at 414 nm in the mixture was recorded at 20 s intervals. The  $^1\text{O}_2$  generation rate was determined from the reduced absorbance over time. To characterize the difference in the rate of  $^1\text{O}_2$  introduced by different nanodrugs, the ratios  $A/A_0$  of absorbance  $A$  and the initial absorbance  $A_0$  at 414 nm at different irradiation times were calculated and plotted as the ordinate for the irradiation time. The dispersion of **nano TKPP-COF** or **DC\_AC50@nano TKPP-COF** (2 mL, 50  $\mu\text{g}/\text{mL}$ ) was used as the reference for this UV-vis measurement.

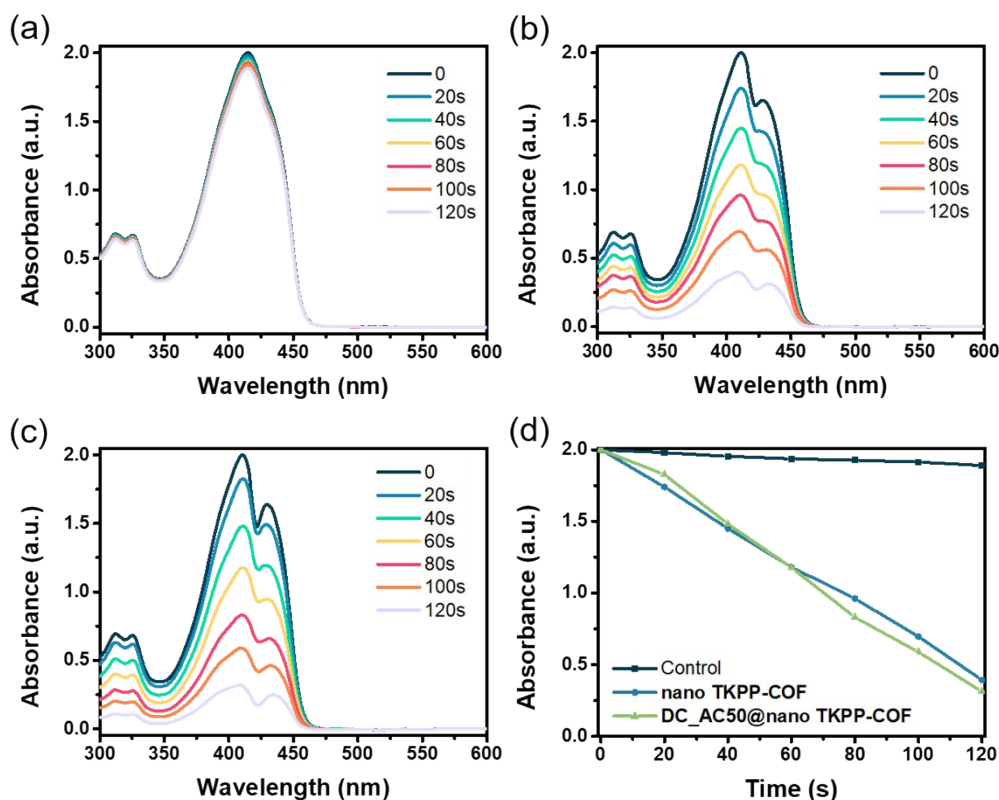

**Fig. S9** (a) UV–vis spectra of DPBF induced by DMF under a 660 nm ( $50 \text{ mW/cm}^2$ , 2 mL) irradiation. (b) UV–vis spectra of DPBF induced by **nano TKPP-COF** under a 660 nm ( $50 \text{ mW/cm}^2$ ,  $50 \text{ }\mu\text{g/mL}$ , 2 mL) irradiation. (c) UV–vis spectra of DPBF induced by **DC\_AC50@nano TKPP-COF** under a 660 nm ( $50 \text{ mW/cm}^2$ ,  $50 \text{ }\mu\text{g/mL}$ , 2 mL) irradiation. (d) Comparison of absorbance decay rates of DPBF at 414 nm induced by **nano TKPP-COF** ( $50 \text{ }\mu\text{g/mL}$ ), **DC\_AC50@nano TKPP-COF** ( $50 \text{ }\mu\text{g/mL}$ ), and DMF (2 mL) under NIR irradiation (660 nm,  $50 \text{ mW/cm}^2$ , 120 s).

### 13. Drug release experiments

For the drug release study, **DC\_AC50@nano TKPP-COF** (8 mg) was suspended in 8 mL PBS. The system was maintained at a magnetic stirring speed of 100 rpm. For NIR smart controlled release, **DC\_AC50@nano TKPP-COF** was exposed to 660 nm NIR laser ( $200 \text{ mW/cm}^2$ ) for 10 min followed by an interval of 10 min, and the procedure was repeated three times. For the drug release potential of **DC\_AC50@nano TKPP-COF**, the dispersions of **DC\_AC50@nano TKPP-COF** were exposed to lasers of different powers ( $0$ ,  $200 \text{ mW/cm}^2$ ,  $600 \text{ mW/cm}^2$ ) of 660 nm. For the release potential of **DC\_AC50@nano TKPP-COF** with short irradiation time, the dispersions of **DC\_AC50@nano TKPP-COF** were exposed to laser at 660 nm with a power of  $100 \text{ mW/cm}^2$  for 8 min. Every once in a while, 3 mL of the above dispersion liquids were taken out and centrifuged immediately and refilled with the same volume of fresh PBS, the solids obtained by centrifugation were also put back together. The amount of released DC\_AC50 was quantified by fluorescence spectrum and the accumulated drug release (ADR) of DC\_AC50 from **DC\_AC50@nano TKPP-COF** was calculated according to the following formula:

$$\text{ADR (wt \%)} = \left\{ \left( 8C_n + 3 \sum_{i=n}^{n-1} C_i \right) / \text{weight of loaded DC\_AC50} \right\} \times 100\%$$
 , where  $C_n$  is the concentration of DC\\_AC50 in the supernatant at the time point of  $n$ .

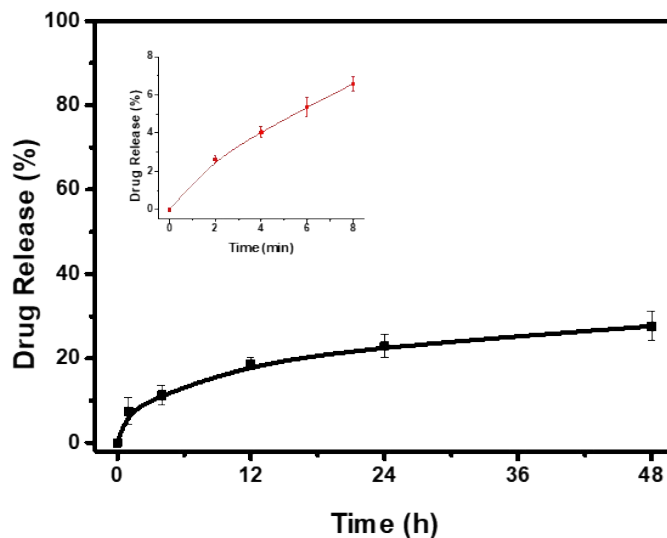

**Fig. S10** Drug release at 48 h after 8 min of irradiation (660 nm, 100 mW/cm<sup>2</sup>, 8 min). The inset shows the drug release profile during irradiation.

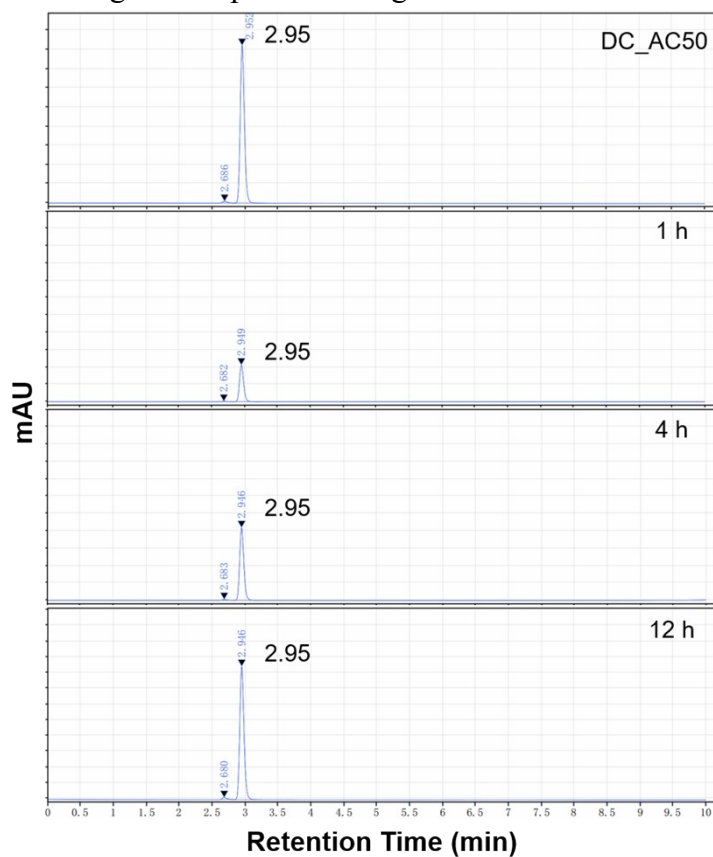

**Fig. S11** High-performance liquid chromatogram (HPLC) of DC\\_AC50 released from DC\\_AC50@nano TKPP-COF dispersion (1 mg/mL, in PBS) at different time points



by near-infrared light irradiation (660 nm, 600 mW/cm<sup>2</sup>). Chromatographic column, Shim-pack VP-ODS; mobile phase, CH<sub>3</sub>CN-H<sub>2</sub>O (19:1, v/v); flow rate, 1.0 mL/min; λ, 254 nm.

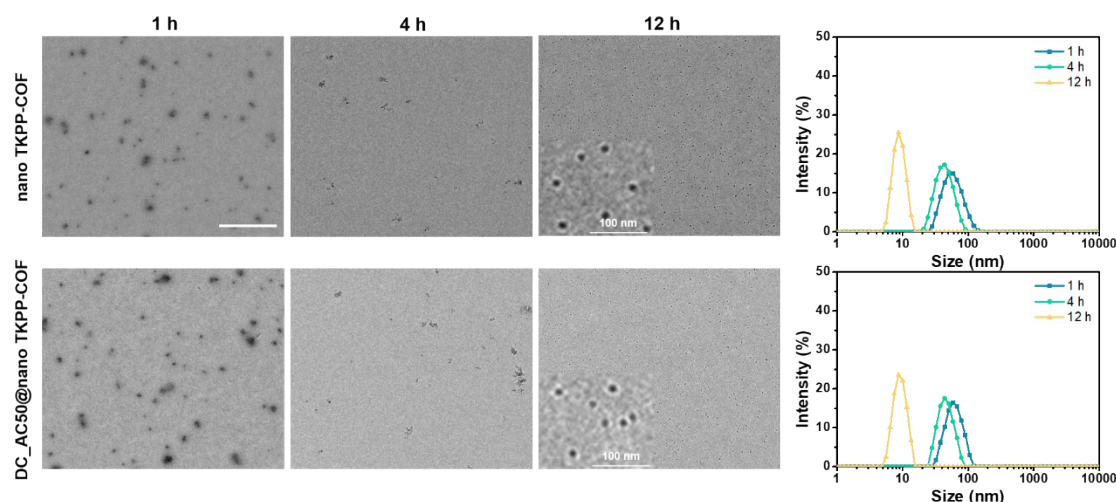

**Fig. S12** Degradation of **nano TKPP-COF** and **DC\_AC50@nano TKPP-COF** (1 mg/mL, in PBS) under NIR light irradiation (660 nm, 600 mW/cm<sup>2</sup>) were examined by TEM and DLS. Scale bar, 500 nm.

#### 14. Cell uptake and subcellular localization

To study the cell uptake, intracellular distribution, and subcellular localization, **nano TKPP-COF** was labelled with the fluorescent dye Bodipy-CHO. Briefly, **nano TKPP-COF-Bodipy** was prepared as follows: first, **nano TKPP-COF** (1.0 mg), Bodipy-CHO (1.0 mg) were added to ethanol (2.0 mL); then, acetic acid (20 μL, 6.0 M) was added into the suspension; after being stirred at 70 °C and 500 rpm for 24 h in the dark, the supernatant was discarded after centrifugation, and the solids were fully washed with ethanol; finally, the solid was re-dispersed into DPBS (1.0 mL) to obtain a stock solution of **nano TKPP-COF-Bodipy** (1.0 mg/mL).

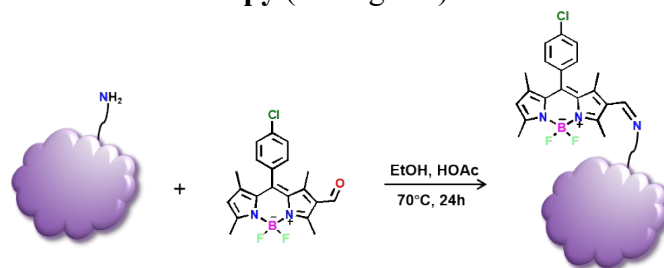

**Fig. S13** Schematic diagram of the synthesis of **nano TKPP-COF-Bodipy**.

For subcellular localization, HT-1080 cells were incubated with **nano TKPP-COF-Bodipy** (200 μL, 10 μg/mL) for 4 h in a CO<sub>2</sub> incubator, and washed with DPBS twice carefully. After an additional 4 h incubation, LysoTracker Red DND-99 (200 μL, 50 nM, 10 min) and MitoTracker Deep Red FM (200 μL, 50 nM, 10 min) were added respectively. Finally, the cells were washed with DPBS twice and the laser scanning confocal fluorescence images were captured. The images of **nano TKPP-COF-Bodipy** were excited by 488 nm light, and the emission wavelength range was collected at 520 ± 15 nm. The images of LysoTracker Red DND-99 were excited by 561 nm light, and



the emission wavelength range was collected at  $597 \pm 17$  nm. The images of MitoTracker Deep Red FM were excited by 633 nm light, and the emission wavelength range was collected at  $665 \pm 15$  nm. Controls were conducted as needed to make sure images were free of crosstalk. Colocalization was analyzed by ImageJ software.

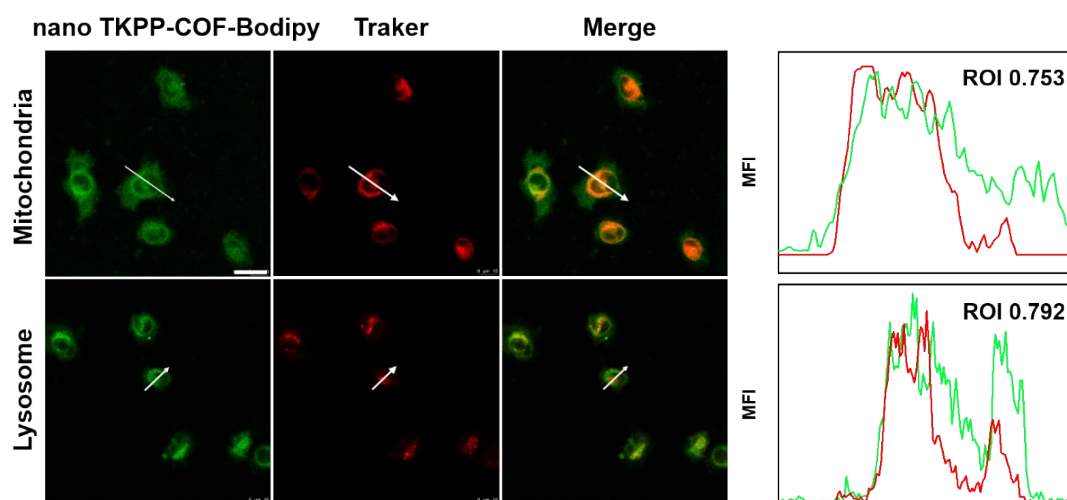

**Fig. S14** Subcellular localization of **nano TKPP-COF-Bodipy** in HT-1080 cells. Scale bar, 20  $\mu$ m.

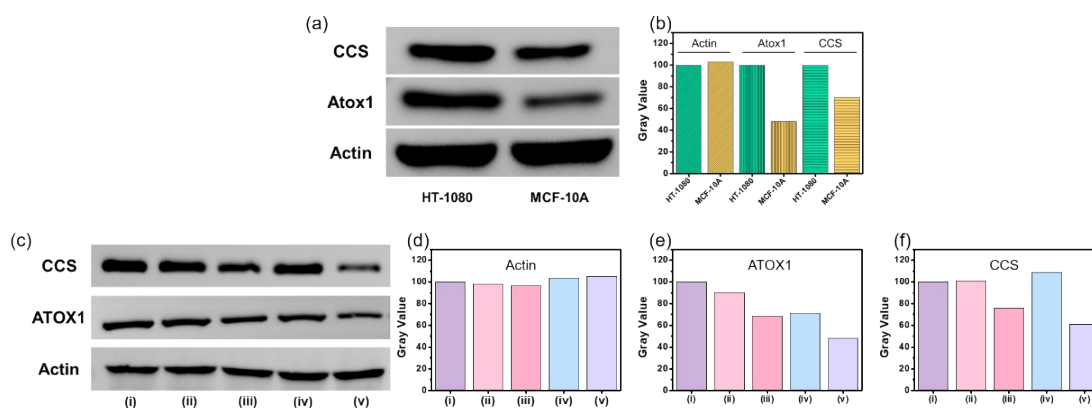

**Fig. S15** (a) Expression of Atox1 and CCS in cancer cells (HT-1080) and normal cells (MCF-10A). (b) The gray values of WB bands of different proteins were quantified by using ImageJ software. (c) Expression of Atox1 and CCS in HT-1080 cells after treatment with different nanodrugs. (d)-(f) The gray values of WB bands of different proteins were quantified by using ImageJ software. (i-v) in the figure represent (i) control, (ii) **nano TKPP-COF**, (iii) **DC\_AC50@nano TKPP-COF**, (iv) **nano TKPP-COF + light**, (v) **DC\_AC50@nano TKPP-COF + light**, respectively.

### 15. Total copper content in HT-1080 cells by ICP-MS detection

Cells were seeded and cultured in 10 cm culture dishes for 24 h and treated with **nano TKPP-COF** or **DC\_AC50@nano TKPP-COF** (5 mL, 30  $\mu$ g/mL) for 4 h in a  $\text{CO}_2$  incubator. After being rinsed with DPBS carefully, for PDT, the cells were exposed to a red LED (50  $\text{mW}/\text{cm}^2$ , 5 min). After that, the cells were cultured for an additional 12 or 24 h. The total copper content of cells was determined using ICP-MS spectroscopy. We collected  $8 \times 10^6$  cells in 150  $\mu$ L DPBS buffer for total Cu uptake experiments and

acidified them with 200  $\mu\text{L}$  70% nitric acid incubated for 12 h at 80  $^{\circ}\text{C}$ , diluted to 5 mL by  $\text{H}_2\text{O}$ , and used for analysis.

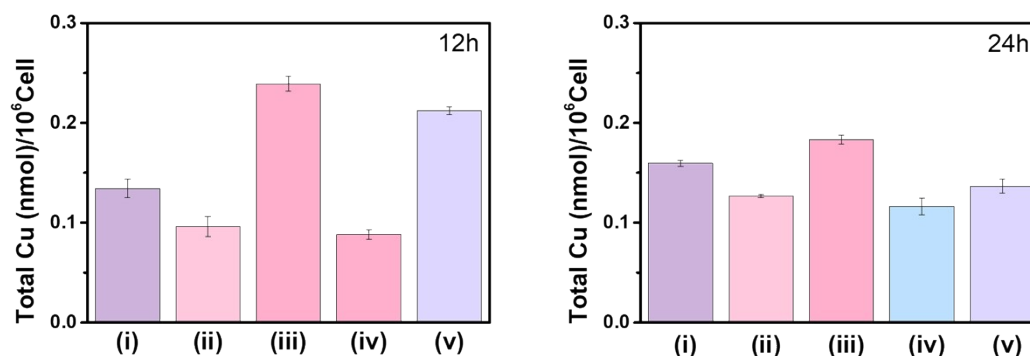

**Fig. S16** The total copper content in HT-1080 cells were incubated with different nanodrugs at different times. (i-v) in the figure represent (i) control, (ii) **nano TKPP-COF**, (iii) **DC\_AC50@nano TKPP-COF**, (iv) **nano TKPP-COF + light**, (v) **DC\_AC50@nano TKPP-COF + light**, respectively.

### 16. Intracellular total ROS measurements

Levels of intracellular ROS were measured by the cell-permeable dye DCFH-DA. Experimentally, cells were treated with DC\_AC50 (500  $\mu\text{L}$ , 20  $\mu\text{M}$ ), **nano TKPP-COF** or **DC\_AC50@nano TKPP-COF** (500  $\mu\text{L}$ , 30  $\mu\text{g}/\text{mL}$ ) for 4 h in a  $\text{CO}_2$  incubator. And then the cells were washed with DPBS carefully. Afterward, the cells were loaded with DCFH-DA (200  $\mu\text{L}$ , 100 nM) for 15 min in a  $\text{CO}_2$  incubator and washed with DPBS twice. For PDT, the cells were exposed to red LED (50  $\text{mW}/\text{cm}^2$ , 5 min). Finally, the laser scanning confocal fluorescence images were captured. The green images were excited by a 488 nm light, and the emission wavelength range was collected at  $525 \pm 20$  nm. Cells without any nano-drug treatment were used as a control group.

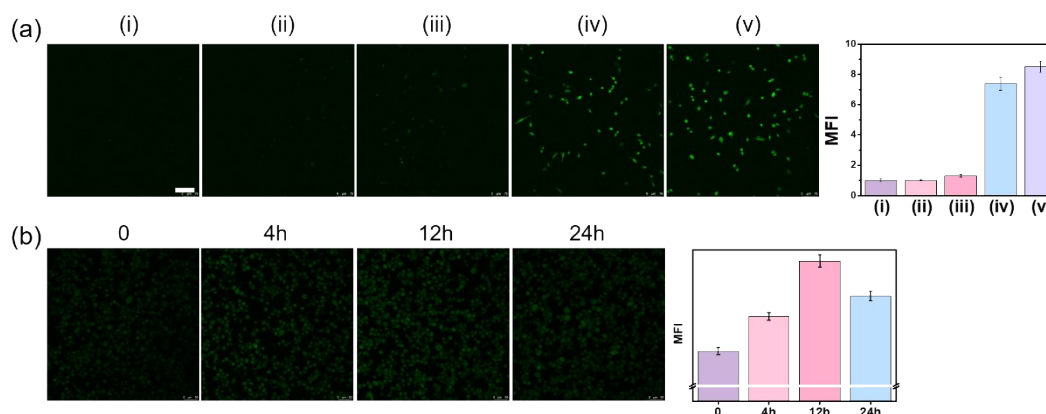

**Fig. S17** (a) Detection of  $^1\text{O}_2$  in HT-1080 cells treated with different nanodrugs using DCFH-DA. (b) The effect of free DC\_AC50 on ROS in HT-1080 cells. DC\_AC50 was able to increase the ROS level in cancer cells such as HT-1080 cells, which is beneficial to the sustained drug release of **DC\_AC50@nano TKPP-COF** *in vitro*. Scale bar, 50  $\mu\text{m}$ . (i-v) in the figure represent (i) control, (ii) **nano TKPP-COF**, (iii) **DC\_AC50@nano TKPP-COF**, (iv) **nano TKPP-COF + light**, (v) **DC\_AC50@nano TKPP-COF + light**, respectively.

### 17. Mitochondrial membrane potential measurements

Mitochondrial membrane potential was measured by a fluorescent lipophilic carbocyanine dye JC-1. Experimentally, cells were treated with **nano TKPP-COF** or **DC\_AC50@nano TKPP-COF** (500  $\mu$ L, 30  $\mu$ g/mL) for 4 h in a CO<sub>2</sub> incubator. And then the cells were washed with DPBS carefully. For PDT, the cells were exposed to red LED (50 mW/cm<sup>2</sup>, 5 min). After additional 4 h incubation, the cells were incubated with JC-1 (200  $\mu$ L, 15  $\mu$ M) for 10 min in a CO<sub>2</sub> incubator and washed with DPBS twice. Finally, the laser scanning confocal fluorescence images were captured. The green images of the monomer were excited by 488 nm light, and the emission wavelength range was collected at 530  $\pm$  15 nm. The red images of J-aggregate were excited by 561 nm light, and the emission wavelength range was collected at 590  $\pm$  17 nm. Cells without any nano-drug treatment were used as a control group.

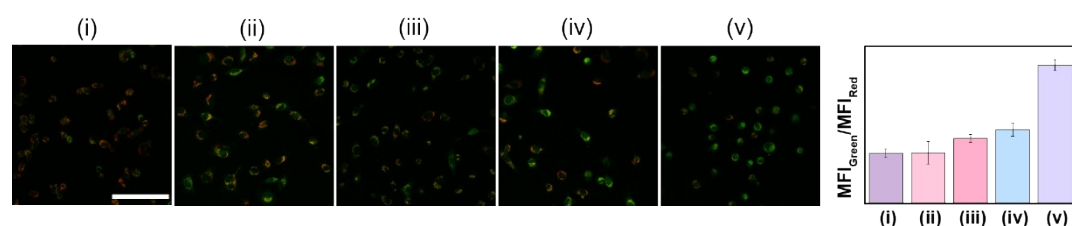

**Fig. S18** Laser scanning confocal fluorescence microscopy images of JC-1 staining for determining mitochondrial membrane potential. (i-v) in the figure represent (i) control, (ii) **nano TKPP-COF**, (iii) **DC\_AC50@nano TKPP-COF**, (iv) **nano TKPP-COF** + light, (v) **DC\_AC50@nano TKPP-COF** + light, respectively.

### 18. Intracellular ATP production measurement

The level of intracellular ATP was measured using an ATP assay kit. Experimentally, cells were seeded and cultured in 10 cm culture dishes for 24 h and treated with **nano TKPP-COF** or **DC\_AC50@nano TKPP-COF** (5 mL, 30  $\mu$ g/mL) for 4 h in a CO<sub>2</sub> incubator. After being rinsed with DPBS carefully, for PDT, the cells were exposed to a red LED (50 mW/cm<sup>2</sup>, 5 min). After that, the cells were cultured for an additional 24 h and taken for ATP measurements according to the manufacturer's guidelines of the assay kit. Luminescence was measured with a spectrofluorometer (SPECTRA Max Gemini; Molecular Probe) immediately after the addition of ATP enzyme mix to the cell suspension. The ATP content was normalized to the total protein amount of the cell lysates from a parallel plate and expressed as a percentage value relative to the control group value.

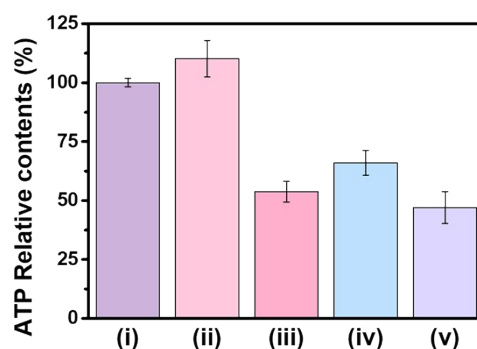

**Fig. S19** The intracellular ATP content of HT-1080 cells was incubated with different

nanodrugs. (i-v) in the figure represent (i) control, (ii) **nano TKPP-COF**, (iii) **DC\_AC50@nano TKPP-COF**, (iv) **nano TKPP-COF + light**, (v) **DC\_AC50@nano TKPP-COF + light**, respectively.

### 19. Intracellular and extracellular lactate measurement

Experimentally, cells were seeded and cultured in 10 cm culture dishes for 24 h and treated with **nano TKPP-COF** or **DC\_AC50@nano TKPP-COF** (5 mL, 30  $\mu\text{g}/\text{mL}$ ) for 4 h in a  $\text{CO}_2$  incubator. After being rinsed with DPBS carefully, for PDT, the cells were exposed to a red LED (50  $\text{mW}/\text{cm}^2$ , 5 min). After that, the cells were cultured for an additional 24 h and washed with DPBS twice. The cells without treatment were used as control. Next, the cell media were collected for extracellular lactate measurements; the cells were lysed in the presence of Triton X-100 (1%) at 4  $^\circ\text{C}$  for intracellular lactate measurements. The lactate measurements were used with a Lactate Assay Kit according to the protocol provided by the kit supplier.

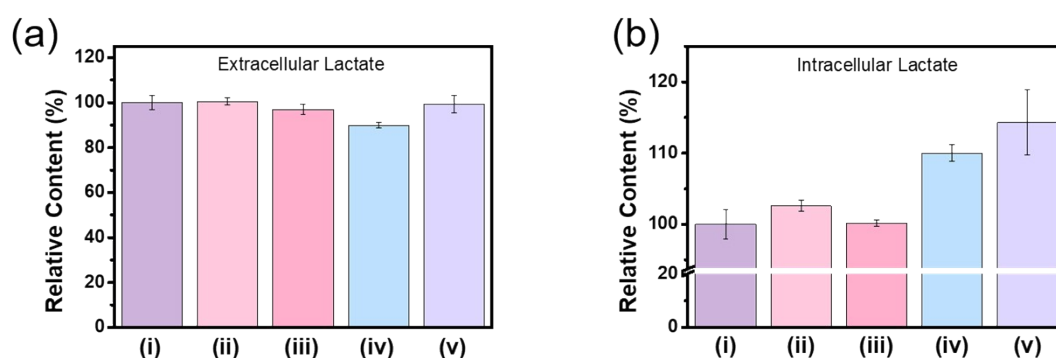

**Fig. S20** (a) Extracellular lactate content of HT-1080 cells. (b) Intracellular lactate content of HT-1080 cells. Scale bar, 100  $\mu\text{m}$ . (i-v) in the figure represent (i) control, (ii) **nano TKPP-COF**, (iii) **DC\_AC50@nano TKPP-COF**, (iv) **nano TKPP-COF + light**, (v) **DC\_AC50@nano TKPP-COF + light**, respectively.

### 20. Lysosomal membrane permeabilization detections

Lysosomal membrane permeabilization was measured by a lysosomotropic metachromatic fluorochrome AO. Experimentally, cells were treated with various **nano TKPP-COF** or **DC\_AC50@nano TKPP-COF** (500  $\mu\text{L}$ , 30  $\mu\text{g}/\text{mL}$ ) for 4 h in a  $\text{CO}_2$  incubator. And then the cells were washed with DPBS carefully. For PDT, the cells were exposed to red LED (50  $\text{mW}/\text{cm}^2$ , 5 min). After additional 4 h incubation, the cells were incubated with AO (200  $\mu\text{L}$ , 15  $\mu\text{M}$ ) for 10 min in a  $\text{CO}_2$  incubator and washed with DPBS twice. Finally, the laser scanning confocal fluorescence images were captured. The green images of deprotonated AO were excited by 488 nm light, and the emission wavelength range was collected at  $530 \pm 20$  nm. The red images of protonated AO were excited by 561 nm light, and the emission wavelength range was collected at  $640 \pm 20$  nm. Cells without any nano-drug treatment were used as a control group.

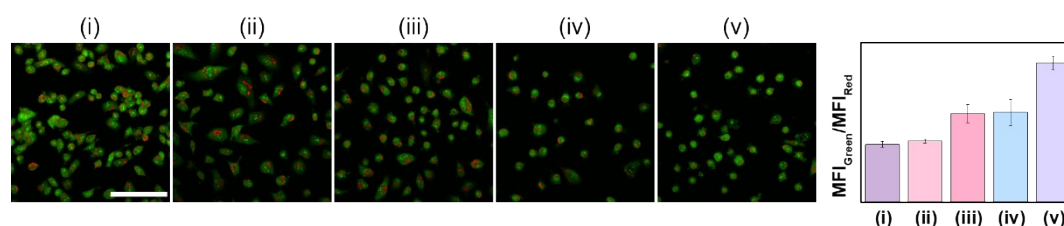

**Fig. S21** Laser scanning confocal fluorescence microscopy images of AO staining for determining lysosomal membrane permeabilization. Scale bar, 100  $\mu\text{m}$ . (i-v) in the figure represent (i) control, (ii) **nano TKPP-COF**, (iii) **DC\_AC50@nano TKPP-COF**, (iv) **nano TKPP-COF + light**, (v) **DC\_AC50@nano TKPP-COF + light**, respectively.

### 21. CCK-8 cell viability assays

Standard CCK-8 assay was applied to evaluate the cell cytotoxicity of the nanodrugs. Experimentally, cells were cultured in 96-well plates for 24 h and treated with **nano TKPP-COF** or **DC\_AC50@nano TKPP-COF** (100  $\mu\text{L}$ , 0~30  $\mu\text{g}/\text{mL}$ ) for 4 h in a  $\text{CO}_2$  incubator. And then the cells were washed with DPBS carefully. For PDT, the cells were exposed to red LED (50  $\text{mW}/\text{cm}^2$ , 5 min), and cultured for an additional 24 h. Subsequently, the CCK-8 solution (10  $\mu\text{L}$ ) was added to each well and the plate was incubated in a  $\text{CO}_2$  incubator for about 2 h. The absorbance at 450 nm was determined using a multi-mode microplate detection system. The cells without treatment were used as the control. The wells without cells were used as blanks. The cell viability was expressed as a percentage value relative to the control group value.

### 22. Calcein-AM/PI double staining

Cells were seeded into 60 mm culture dishes and incubated overnight in a  $\text{CO}_2$  incubator. After removal of the culture medium, the cells were incubated with DPBS dispersion of **nano TKPP-COF** or **DC\_AC50@nano TKPP-COF** (2 mL, 30  $\mu\text{g}/\text{mL}$ ) for 4 h in a  $\text{CO}_2$  incubator. For PDT, the cells were exposed to red LED (50  $\text{mW}/\text{cm}^2$ , 5 min). After additional 24 h incubation, the cells were collected using Trypsin solution, washed with DPBS twice carefully, and incubated with calcein-AM (500  $\mu\text{L}$ , 2  $\mu\text{M}$ ) and PI (500  $\mu\text{L}$ , 4  $\mu\text{M}$ ) for 15 min. Finally, the cells were carefully washed twice with DPBS, the cancer cells were redispersed with DPBS, and the dispersed cells were placed in a glass dish and imaged with a laser scanning confocal microscope. The green images of living cells were excited by 488 nm light, and the emission wavelength range was collected at  $520 \pm 20$  nm. The red images of dead cells were excited by 514 nm light, and the emission wavelength range was collected at  $640 \pm 20$  nm.

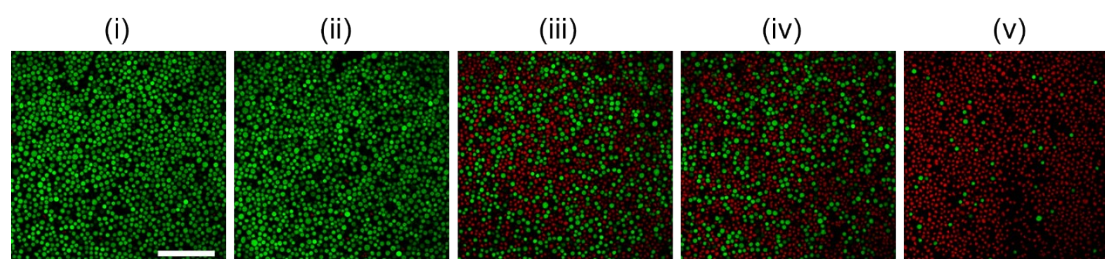

**Fig. S22** Calcein-AM/PI double staining. Scale bar, 200  $\mu\text{m}$ . (i-v) in the figure represent (i) control, (ii) **nano TKPP-COF**, (iii) **DC\_AC50@nano TKPP-COF**, (iv) **nano**



TKPP-COF + light, (v) DC\_AC50@nano TKPP-COF + light, respectively. For group iv and group v, the power of the LED lamp was 50 mW/cm<sup>2</sup>, and the illumination time was 5 min.

### 23. Colony formation assays

Cells were seeded into 35 mm culture dishes at a density of  $5 \times 10^4$  cells/well and incubated overnight in a CO<sub>2</sub> incubator. After removal of the culture medium, the cells were incubated with nano TKPP-COF or DC\_AC50@nano TKPP-COF (100  $\mu$ L, 30  $\mu$ g/mL) for 4 h in a CO<sub>2</sub> incubator. And then the cells were washed with DPBS carefully. For PDT, the cells were exposed to red LED (50 mW/cm<sup>2</sup>, 5 min) and cultured for an additional 24 h. Subsequently, the cells were released with trypsin/EDTA solution followed by harvesting and staining by Trypan Blue (0.4 wt%) to determine live cell number. The same number of live cells were re-seeded into 60 mm culture dishes at a density of  $\sim 1000$  live cells/dish, and cultured for about a week until small colonies could be seen. For crystal violet staining, the cell colonies were washed with DPBS 3 times, fixed in cold methanol for 30 min, stained with fresh Crystal Violet solution for 30 min, and rinsed with water. Cells without any nano-drug treatment were used as a control group.

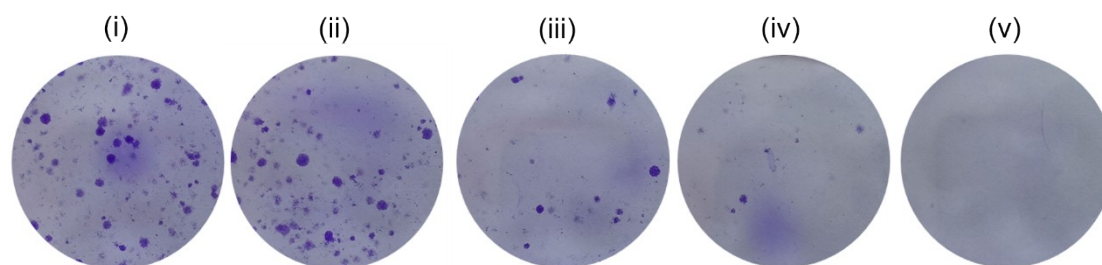

**Fig. S23** *In vitro* clonogenic assay of HT-1080 cells pretreated with different nanodrugs. (i-v) in the figure represent (i) control, (ii) nano TKPP-COF, (iii) DC\_AC50@nano TKPP-COF, (iv) nano TKPP-COF + light, (v) DC\_AC50@nano TKPP-COF + light, respectively. For group iv and group v, the power of the LED lamp was 50 mW/cm<sup>2</sup>, and the illumination time was 5 min.

### 24. HT-1080 cells invasion assay

Cells were seeded into 35 mm culture dishes at a density of  $5 \times 10^4$  cells/well and incubated overnight in a CO<sub>2</sub> incubator. After removal of the culture medium, the cells were incubated with nano TKPP-COF or DC\_AC50@nano TKPP-COF (100  $\mu$ L, 30  $\mu$ g/mL) for 4 h in a CO<sub>2</sub> incubator. And then the cells were washed with DPBS carefully. For PDT, the cells were exposed to red LED (50 mW/cm<sup>2</sup>, 5 min) and cultured for an additional 24 h. The medium was changed to a serum-free medium and incubated for 24 h to further remove the effect of serum. The cells were digested, terminated by centrifugation, washed with a serum-free culture medium, and resuspended in a serum-free culture medium and the cell density of live cells was adjusted to  $5 \times 10^5$ . 500  $\mu$ L of complete medium containing 10% FBS was added to the 24-well plate and 200  $\mu$ L of cell suspension was added to the Cell Culture Inserts small chamber. At the end of incubation, the medium was discarded and the cells outside the Cell Culture Inserts small chamber were stained with 0.1% crystalline violet for 20 min after wiping off the stromal gel and cells in the Cell Culture Inserts small chamber with

a cotton swab.

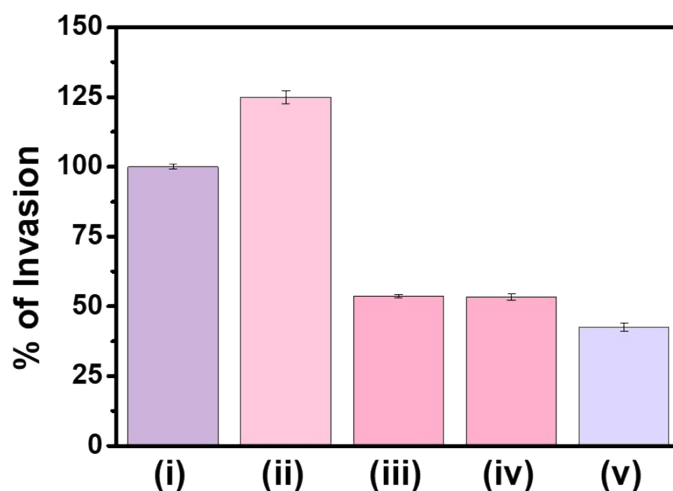

**Fig. S24** The results of the matrigel invasion assay. (i-v) in the figure represent (i) control, (ii) nano TKPP-COF, (iii) DC\_AC50@nano TKPP-COF, (iv) nano TKPP-COF + light, (v) DC\_AC50@nano TKPP-COF + light, respectively.

## 25. Cell death rescue experiments

For cell death rescue experiments, cells were cultured in 96-well plates for 12 h. The designated modulating compound including Z-VAD-FMK (100  $\mu$ L, 200  $\mu$ M), ferrostatin-1 (100  $\mu$ L, 20  $\mu$ M), liproxstatin-1 (100  $\mu$ L, 20  $\mu$ M), necrostatin-1 (100  $\mu$ L, 2000 nM), 3-MA (100  $\mu$ L, 100  $\mu$ M), N-Acetyl-L-cysteine (100  $\mu$ L, 20  $\mu$ M), VC (100  $\mu$ L, 10  $\mu$ M), rotenone (100  $\mu$ L, 0.5  $\mu$ M), UK5099 (100  $\mu$ L, 0.5  $\mu$ M), were added to each well, pretreated the cells for 2 h. And then treated with DC\_AC50@nano TKPP-COF (100  $\mu$ L, 30  $\mu$ g/mL) for 4 h in a CO<sub>2</sub> incubator. For PDT, the cells were exposed to red LED (50 mW/cm<sup>2</sup>, 8 min). After additional 24 h incubation, the CCK-8 solution (10  $\mu$ L) was added to each well and the plate was incubated in a CO<sub>2</sub> incubator for 2 h. The absorbance at 450 nm was determined using a multi-mode microplate detection system. The wells without cells were used as blanks.

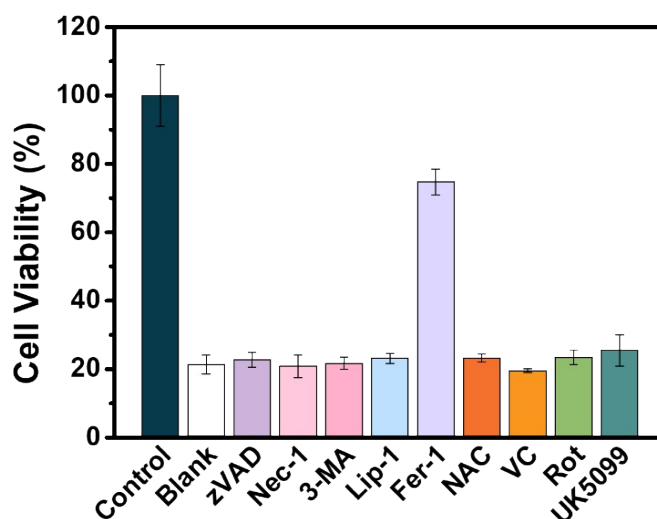

**Fig. S25** Effects of different inhibitors on **DC\_AC50@nano TKPP-COF** + Light induced cell death in HT-1080 cells.

## 26. Intracellular lipid peroxidation assays

Cells were treated with **nano TKPP-COF** or **DC\_AC50@nano TKPP-COF** (500  $\mu$ L, 30  $\mu$ g/mL) for 4 h in a CO<sub>2</sub> incubator. For PDT, the cells were exposed to red LED (50 mW/cm<sup>2</sup>, 5 min). And then the cells were washed with DPBS carefully and cultured for an additional 4 h. After that, the cells were incubated with C<sub>11</sub>-BODIPY (200  $\mu$ L, 2.0  $\mu$ M) for 30 min in a CO<sub>2</sub> incubator and washed with DPBS twice. Finally, the laser scanning confocal fluorescence images were captured. The green images of the oxidized C<sub>11</sub>-BODIPY dye were excited by a 488 nm light, and the emission wavelength range was collected at 510  $\pm$  20 nm. The red images of the reduced C<sub>11</sub>-BODIPY dye were excited by a 561 nm light, and the emission wavelength range was collected at 591  $\pm$  20 nm. Cells without any nanodrug treatment were used as a control group.

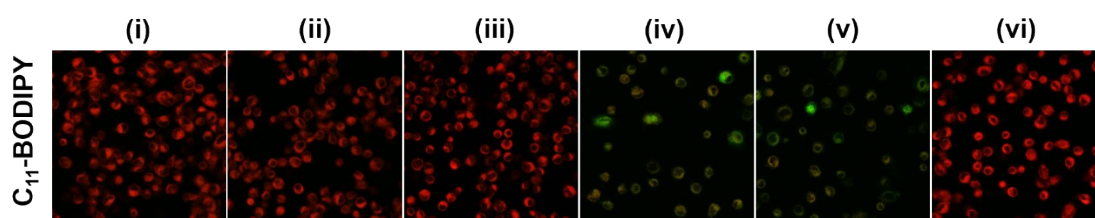

**Fig. S26** LCSM images of HT-1080 cells under different treatment conditions for the detection of intracellular lipid peroxidation using C<sub>11</sub>-Bodipy. (i-vi) in the figure represent (i) control, (ii) **nano TKPP-COF**, (iii) **DC\_AC50@nano TKPP-COF**, (iv) **nano TKPP-COF** + light, (v) **DC\_AC50@nano TKPP-COF** + light, (vi) **DC\_AC50@nano TKPP-COF** + light + Fer-1, respectively.

## 27. Hemolysis analysis

First, fresh nude mouse blood samples (2 mL) were added to PBS solution (4 mL), and red blood cells (RBC) were separated by centrifugation at 3000 rpm for 10 minutes. After washing 5 times with 10 mL PBS solution, the purified red blood cells were diluted to the original solution with PBS (10 times). For the hemolysis assay, 0.2 mL diluted RBCs suspension was mixed with 1.0 mL PBS as the negative control, 1.0 mL deionized water as the positive control, and 1.0 mL **DC\_AC50@nano TKPP-COF** suspension at a concentration range of 1 to 200  $\mu$ g/mL. All mixtures were then allowed to stand at 37 °C for 5 h and centrifuged at 13300 rpm for 10 minutes. The absorbance of 541 nm supernatant was measured by synergy SpectraMax i3x multi-mode microplate reader. The hemolytic percentage of red blood cells was calculated by the following formula: Hemolysis Rate = [ (Dt – Dnc)/(Dpc – Dnc)]  $\times$  100%.



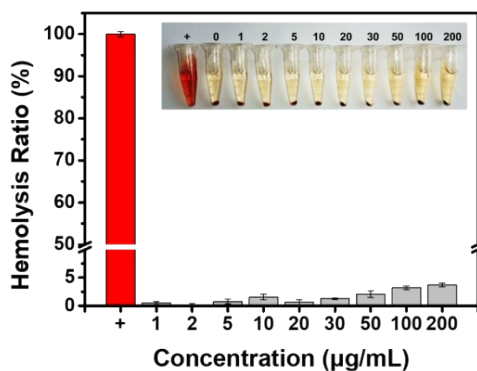

**Fig. S27** Hemolytic assay using red blood cells incubated with control solvents and different concentrations of **DC\_AC50@nano TKPP-COF**.

### 28. In vivo antitumor therapy

HT-1080 cancer cells ( $5 \times 10^6$  cells) suspended in HBSS (40  $\mu$ L) were subcutaneously injected into the flanks of each nude mice to establish the HT-1080 xenograft model. The length (L) and width (W) of the tumor were determined by digital calipers. The tumor volume (V) was calculated by the formula  $V = 1/2 \times L \times W^2$ . When the tumor size reached  $\sim 100 \text{ mm}^3$ , the nude mice bearing HT-1080 tumors (n = 20) were randomly distributed into four groups, i.e., (i) control, (ii) **nano TKPP-COF**, (iii) **DC\_AC50@nano TKPP-COF**, (iv) **nano TKPP-COF + light**, (v) **DC\_AC50@nano TKPP-COF + light**, and (vi) **DC\_AC50@nano TKPP-COF + light + Fer-1** groups. After intratumoral injection PBS (100  $\mu$ L), **nano TKPP-COF** or **DC\_AC50@nano TKPP-COF** (50  $\mu$ L, 1 mg/mL, equivalent 3.3 mg/kg of COF, equivalent to 4.0  $\mu$ mol/kg of DC\_AC50), the nude mice were fed for 4 h, and for the treatment group, light treatment (660 nm laser, 100 mW  $\text{cm}^{-2}$ , 8 min) was performed on the tumor site. For **DC\_AC50@nano TKPP-COF + light + Fer-1** groups, after injection **DC\_AC50@nano TKPP-COF**, Fer-1 (5.0 mg/kg) was injected. The mice continued to be fed for 12 days. The tumor volume and nude mouse body weight were recorded every other day during the experimental period.

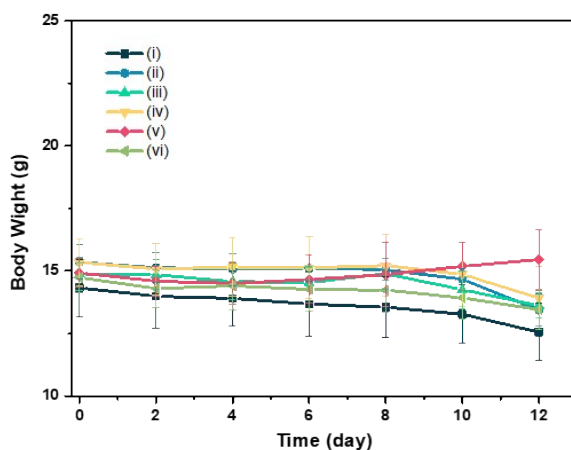

**Fig. S28** Body weight of nude mice after treatment. (i-vi) in the figure represent (i) control, (ii) **nano TKPP-COF**, (iii) **DC\_AC50@nano TKPP-COF**, (iv) **nano TKPP-COF + light**, (v) **DC\_AC50@nano TKPP-COF + light**, (vi) **DC\_AC50@nano TKPP-COF + light + Fer-1** groups.

TKPP-COF + light + Fer-1, respectively.

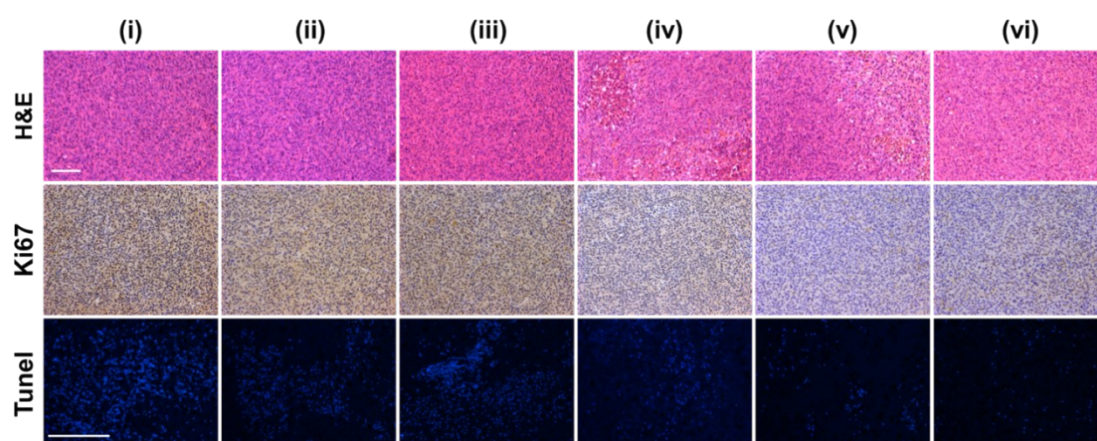

**Fig. S29** Representative images of H&E, Ki67, and TUNEL staining of tumor tissues were obtained at the treatment endpoint, scale bar, 100  $\mu\text{m}$ . (i-vi) in the figure represent (i) control, (ii) nano TKPP-COF, (iii) DC\_AC50@nano TKPP-COF, (iv) nano TKPP-COF + light, (v) DC\_AC50@nano TKPP-COF + light, (vi) DC\_AC50@nano TKPP-COF + light + Fer-1, respectively.

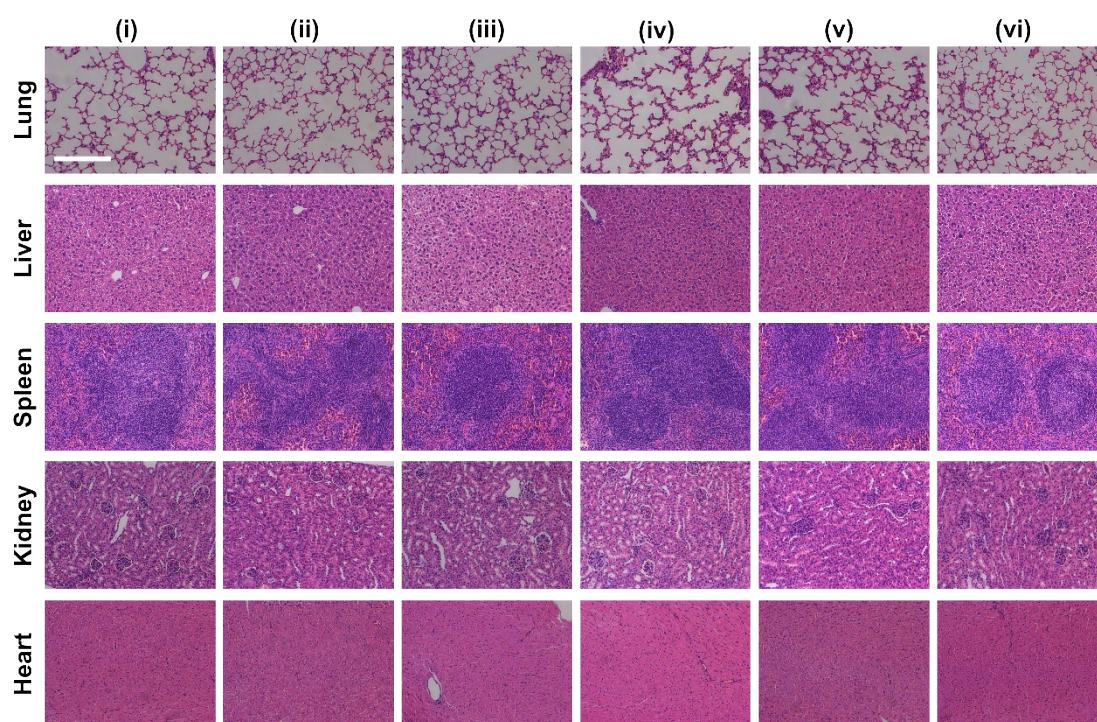

**Fig. S30** H&E stained tissue sections from the lung, liver, spleen, kidney, and heart, of the nude mice at the end of the treatment. Scale bar, 200  $\mu\text{m}$ . (i-vi) in the figure represent (i) control, (ii) nano TKPP-COF, (iii) DC\_AC50@nano TKPP-COF, (iv) nano TKPP-COF + light, (v) DC\_AC50@nano TKPP-COF + light, (vi) DC\_AC50@nano TKPP-COF + light + Fer-1, respectively.
